1 **N-glycosylation engineering in chimeric antigen receptor T cells enhances**  
2 **anti-tumor activity**

3

4 **Elien De Bousser<sup>1,2,4\*</sup> & Nele Festjens<sup>1,2,4\*</sup>, Leander Meuris<sup>1,2,4</sup>, Evelyn Pleets<sup>1,2</sup>, Annelies Van**  
5 **Hecke<sup>1,2</sup>, Elise Wyseure<sup>1,2</sup>, Stijn De Munter<sup>3,4</sup>, Bart Vandekerckhove<sup>3,4</sup>, Nico Callewaert<sup>1,2,4\*</sup>**

6 \*These authors contributed equally to this work

7

8 °Correspondence should be addressed to NC ([Nico.Callewaert@vib-ugent.be](mailto:Nico.Callewaert@vib-ugent.be)) and EDB ([Elien.DeBousser@vib-](mailto:Elien.DeBousser@vib-ugent.be)  
9 [ugent.be](mailto:Elien.DeBousser@vib-ugent.be))

10

11

12 <sup>1</sup>VIB-UGent Center for Medical Biotechnology

13 <sup>2</sup>Department for Biochemistry and Microbiology, Ghent University

14 Technologiepark-Zwijnaarde 75, B-9052 Gent, Belgium

15 <sup>3</sup>Department of Diagnostic Sciences, Ghent University, 9000 Ghent, Belgium

16 <sup>4</sup>Cancer Research Institute Ghent (CRIG), Ghent, Belgium

17

18

19

20

21

22

23

24

25 Author contributions

26 EDB and NF were responsible for the experimental design and data analysis. EDB, NF, EP, AVH and EW  
27 acquired the data. LM performed the statistical analyses. SDM designed the CD70 nanoCAR and set up the  
28 assays for functional analysis under the supervision of BV. NC initiated and supervised the project and  
29 manuscript writing.

## 30 Abstract

31 Recently, chimeric antigen receptor (CAR) T cell technology has revolutionized cancer immunotherapy. This  
32 strategy uses synthetic CARs to redirect T cells to specific antigens expressed on the surface of tumor cells.  
33 Despite impressive progress in the treatment of hematological malignancies with CAR T cells, scientific  
34 challenges still remain for use of CAR T cell therapy to treat solid tumors. This is mainly due to the hostile  
35 tumor microenvironment and CAR-related toxicities. As the glycans decorating the T cell surface are  
36 implicated in T cell activation, differentiation, proliferation, and in the interaction of human T cells with  
37 tumor cells, we studied the role of human T cell glycosylation in more depth by manipulating their glycome.  
38 In this context, there is *in vitro* evidence that  $\beta$ -galactoside binding lectins (Galectins) can have a strong  
39 impact on the functionality of tumor-infiltrating T cells. The high-affinity poly-LacNAc N-linked galectin  
40 ligands are mainly synthesized onto the  $\beta$ 1,6-GlcNAc branch introduced by N-  
41 acetylglucosaminyltransferase V (GnTV, encoded by *Mgat5*). We showed that knocking out *Mgat5* in CD70  
42 targeting CAR T cells leads to lower densities of poly-LacNAc modifications on the CAR T cell surface. Most  
43 interestingly, our results indicate that MGAT5 KO CD70 CAR T cells show enhanced potency to control  
44 primary tumors and relapses.

## 45 Introduction

46 Immunotherapy with T cells that are genetically modified to express chimeric antigen receptors (CARs),  
47 which target tumor-associated molecules, has shown impressive efficacy in several malignancies<sup>1</sup>. The  
48 advent of second-generation CAR T cells, in which activating and costimulatory signaling domains are  
49 combined, has led to encouraging results in patients with chemo-refractory B cell malignancies<sup>2,3</sup>.  
50 However, the translation of this clinical success to the treatment of solid tumors requires overcoming  
51 multiple obstacles<sup>4</sup>. In general, it is required to generate robust and stable populations of T cells that are  
52 able to infiltrate the tumor and escape the immunosuppressive effect of the tumor microenvironment  
53 (TME). Further issues in CAR T cell therapy include antigen escape, CAR T cell therapy-related toxicities and  
54 the relatively high occurrence of tumor relapse.

55 Cell surface glycosylation plays an important role in the interaction of human T cells with tumor cells and  
56 often contributes to escape mechanisms adopted by the tumor to evade T cell anti-tumor immunity<sup>5</sup>. For  
57 example, the expression of immune checkpoint inhibitors such as PD-1 and CTLA-4 is tuned by  
58 glycosylation<sup>6-8</sup>. Further, there is *in vitro* evidence that  $\beta$ -galactoside binding lectins (Galectins) can have a  
59 strong impact on the functionality of tumor-infiltrating T cells<sup>9</sup>. Galectin-1 controls T cell effector function  
60 homeostasis by regulating activation, differentiation, survival and cytokine production<sup>10</sup>. Galectin-9 is one  
61 of the ligands of Tim-3 and negatively regulates T cell immunity<sup>11</sup>. Binding of Galectin-3 to glycoproteins  
62 has both pro- and anti-apoptotic effects on T cells, depending on its localization. Intracellular Galectin-3  
63 blocks apoptosis by stabilizing the mitochondrial membrane and preventing cytochrome c release,<sup>12</sup> while  
64 extracellular Galectin-3 binds to glycoproteins such as CTLA-4 and Lag3 on the T cell surface, leading to  
65 inhibition and cell death of activated T cells<sup>13,14</sup>. Endogenous Galectin-3, produced by activated T cells, is  
66 recruited to the immunological synapse. There it negatively regulates T cell activation by destabilizing the  
67 immunological synapse through direct interactions with glycoproteins associated with the T cell receptor,  
68 and by promoting downregulation of the TCR<sup>15,16</sup>. Another interesting finding is that binding of Galectin-3  
69 to antigen-specific activated CD8<sup>+</sup> T cells inhibits their effector function within the tumor  
70 microenvironment<sup>13</sup>. It was shown that Galectin-3 prevents the formation of a functional secretory synapse  
71 by trapping LFA-1 in glycan-Galectin lattices, leading to reduced cytokine secretion<sup>17</sup>. *Ex vivo* treatment of  
72 T cells with an anti-Galectin-3 antibody or a Galectin competitive binder such as N-acetyllactosamine  
73 (LacNAc) resulted in the detachment of surface Galectin-3 leading to increased cytotoxicity and ability to  
74 secrete cytokines such as IFN- $\gamma$ <sup>9,18</sup>.

75 The high-affinity poly-LacNAc N-linked galectin ligands are mainly synthesized onto the  $\beta$ 1,6-GlcNAc branch  
76 introduced by N-acetylglucosaminyltransferase V (**MGAT5**) (**Figure 1.A**). Knocking out *Mgat5* should thus  
77 also strongly reduce the density of poly-LacNAc modifications on the cell surface.

78 MGAT5 deficiency was shown to markedly increase TCR clustering and signaling at the immune synapse,  
79 resulting in a lower T cell activation threshold and increased incidence of autoimmune disease *in vivo* and  
80 in human<sup>19</sup>.

81 To evaluate the impact of altered cell surface glycosylation on cytotoxic T cell functionality, specifically in  
82 a cancer immunotherapy setting, we used CD70 as the CAR target. Nanobodies targeting CD70 have been  
83 thoroughly evaluated as antigen-binding module in a CAR format (CD70 nanoCAR) in the lab of Prof. Dr.  
84 Bart Vandekerckhove (Department of Clinical Chemistry, Microbiology and Immunology, Ghent  
85 University)<sup>20</sup>. We specifically aimed to evaluate the impact of glyco-engineering via *Mgat5* KO on the CAR  
86 T cell glycome and on their *in vitro* and *in vivo* activation, proliferation, differentiation and anti-tumor  
87 functionality.

88 We could demonstrate that MGAT5 KO CD70 nanoCAR T cells are functional and even perform better than  
89 CD70 nanoCAR T cells, both *in vitro* and *in vivo*. Both the average tumor volume and the tumor growth rate  
90 of primary and secondary tumors are significantly lower in the MGAT5 KO CD70 nanoCAR T cell treated  
91 group, as compared to the CD70 nanoCAR T cell treated mice. These results show that disrupting N-  
92 glycosylation modifications on CAR T cells enhances their capability to control primary tumors and  
93 subsequent relapses. Interestingly, MGAT5 KO CD70 nanoCAR T cells are present in higher numbers than  
94 CD70 nanoCAR T cells both *in vitro* and in peripheral blood and spleen upon specific antigen recognition.

## 95 Results

### 96 Engineering of MGAT5 KO CD70 nanoCAR T cells

97 We optimized a workflow for the combined CRISPR-Cas9 mediated glyco-gene editing and retroviral CAR  
98 delivery to purified, activated human CD3<sup>+</sup> T cells. The presence of both CD4<sup>+</sup> and CD8<sup>+</sup> T cell subsets in the  
99 final CAR T cell product is indispensable for efficient anti-tumor immunity.

100 To efficiently combine CRISPR-Cas9-based glyco-gene editing and retroviral CAR delivery, various  
101 experimental steps were optimized. Optimal editing and transduction efficiencies were obtained when  
102 CD3<sup>+</sup> T cells were stimulated with Immunocult for three days, after which activated T cells were first  
103 subjected to Cas9 RNP nucleofection, followed by a 1-hit retroviral transduction on the same day.  
104 Engineering efficiencies were assessed on day 10. The experimental timeline is depicted in **Figure 1.B**.

105 CRISPR editing efficiencies were determined by Sanger sequencing of the region of interest followed by ICE  
106 analysis, and the mean editing efficiency as percentage insertions and deletions (% indel) for the *Mgat5*  
107 locus over multiple experiments was consistently high (exceeding 80% indel) as is depicted in **Figure 1.C**.  
108 Flow cytometry was used to measure both CD70 nanoCAR expression and GFP expression as read outs of  
109 the retroviral transduction efficiency. High CD70 nanoCAR transduction efficiencies were consistently

110 obtained over multiple experiments, irrespective of the simultaneous glyco-gene engineering as shown in  
111 **Figure 1.D.**

### 112 **MGAT5 KO CD70 nanoCAR T cells show an altered glycoalyx**

113 In order to be able to assess the extent of the intended glycosylation changes upon glyco-gene engineering,  
114 we developed a lectin-based flow cytometry assay. For the detection of poly-LacNAc structures, we used  
115 the lectin from *Datura stramonium* (DSL) (**Figure 1.E**). This lectin is reported to bind well to LacNAc and  
116 oligomers containing repeating LacNAc sequences next to its preferred N-acetylglucosamine oligomer  
117 ligand.

118 When comparing the DSL lectin stain intensity of mock engineered CD70 nanoCAR T cells with that of  
119 MGAT5 KO CD70 nanoCAR T cells, we observe a clear reduction in signal, indicating that we successfully  
120 eliminated N-glycan  $\beta$ 1,6-branching and subsequent elongation of this branch with poly-LacNAc  
121 modifications.

122 As a complementary method to profile the CAR T cell surface glycosylation, we adapted the DSA-FACE  
123 method developed in our research group to enable the analysis of cell surface N-glycosylation. We aimed  
124 to directly release the N-glycans from the cell surface by applying the PNGaseF digest on living cells in  
125 suspension. We established an optimized protocol in which we incubate  $1 \times 10^6$  cells per sample in the  
126 presence of 0.125 IU PNGaseF in PBS for 2 hours at 37°C. Subsequently, the cells are removed by  
127 centrifugation and the crude digest is labeled with APTS for 1 hour at 70°C. After two rounds of clean-up  
128 over Sephadex resin to remove excess label and salts, labeled N-glycans are resuspended in water and  
129 analyzed by DSA-FACE. The complete protocol is schematically depicted in **Figure 1.F**.

130 When CAR T cells are engineered for MGAT5, the N-glycan profile is clearly different from that of mock-  
131 engineered CAR T cells (**Figure 1.F**). The peaks in P6 disappear while the peaks in P4 show a higher intensity  
132 relative to P2 and P3. This shift in electrophoretic mobility is consistent with the removal of one LacNAc  
133 unit (two monosaccharide units) or a shift from a tetra-antennary to a tri-antennary N-glycan. These DSA-  
134 FACE results are also in agreement with the lectin-staining experiments, where we observed a reduction  
135 in DSL staining intensity upon MGAT5 engineering (**Figure 1.E**). When comparing to the annotated N-glycan  
136 profile of human plasma (data not shown), this observation indeed confirms that P6 corresponds to a tetra-  
137 antennary N-glycan, while peaks in P4 and P5 correspond to tri-antennary N-glycan structures.

### 138 **Characterization of the CD70 expressing tumor cell lines**

139 In order to study the anti-tumor functionality of the MGAT5 KO CD70 nanoCAR T cells, two tumor cell lines  
140 were used in our studies. THP-1 cells are a M4 subtype acute myeloid leukemia (AML) cell line and SKOV-3  
141 cells are a serous adenocarcinoma cell line. We confirmed the cell surface CD70 expression on these cells

142 by flow cytometry (**Supplementary Figure 1.A**). Jurkat cells (immortalized line of human T cells) were  
143 included as a negative control. Further, we performed the anti-CD70 cell surface staining on non-  
144 transduced (NTC) and CD70 nanoCAR transduced CD3<sup>+</sup> T cells and did not identify auto-antigen expression.

145 Galectins exert a broad range of effects during different aspects of T cell-mediated immunity by the  
146 formation of lattices on the T cell surface<sup>5</sup>. In anti-tumor immunity, it has been shown that Galectin-1 and  
147 Galectin-3 in the TME lead to tolerogenic signaling and immune suppression. LacNAc is the ligand  
148 recognized by Galectins and the affinity of the interaction is proportional to the LacNAc content of the  
149 glycan structure. We hypothesized that by eliminating MGAT5 expression in order to reduce the poly-  
150 LacNAc content on cytotoxic T cells, the inhibitory effect of Galectins on T cell immunity can be reduced.  
151 To this end, we first verified that the tumor cell lines used in our study indeed express Galectin-1 and  
152 Galectin-3.

153 Secretion and subsequent cell surface binding of Galectin-1 and -3 was detected by performing a flow  
154 cytometry experiment with anti-Galectin-1 and -3 antibodies. The results are shown in **Supplementary**  
155 **Figure 1.B**. As positive control, cells were incubated with recombinant Galectin-1 or -3 before performing  
156 the cell surface staining. As a negative control, cell surface Galectin binding was abolished by the addition  
157 of the competitive inhibitor lactose. Jurkat cells were included as negative control cells. Galectin-1  
158 expression is detected for both the THP-1 and SKOV-3 cell lines. Further, galectin-3 expression is clearly  
159 observed for the SKOV-3 cell line but only slightly for the THP-1 cell line. No secretion and cell surface  
160 binding of galectins is seen on primary CD3<sup>+</sup> T cells and Jurkat cells. Binding of recombinant Galectin-3 to T  
161 cells leads to an increase in signal, while recombinant Galectin-1 does not seem to bind to the primary T  
162 cells.

163 Additionally, we confirmed the expression of Galectin-1 and -3 in tumor sections from tumor-bearing NSG  
164 mice (**Supplementary Figure 1.C**). The latter were obtained by ectopically inoculating human SKOV-3 cells.  
165 The SKOV-3 tumor model is used in the experiments described below.

#### 166 **MGAT5 KO CD70 nanoCAR T cells are functional *in vitro***

167 In a first set of experiments, we evaluated the viability and functionality of MGAT5 KO CD70 nanoCAR T  
168 cells *in vitro*. Viability is maintained for each condition as is depicted in **Figure 2.A**. After engineering and  
169 culturing, most of the cells in the total CD3<sup>+</sup> T cell pool are CD4<sup>+</sup> T cells. Even with the 4-1BB signal in the  
170 CAR construct, which is believed to support a moderate rise in the CD8<sup>+</sup> T cell fraction, the CAR T cell groups  
171 show a decrease in the CD8<sup>+</sup> population. Furthermore, this decrease is even more pronounced when CD70  
172 nanoCAR T cells were CRISPR-Cas9 engineered (both mock Cas9 and MGAT5 KO), which suggests that the  
173 viral transduction and nucleofection procedures might affect the growth of CD8<sup>+</sup> T cells more than that of  
174 CD4<sup>+</sup> T cells (**Figure 2.B**)

175 The antitumor effects of CAR T cells depend on their capacity to secrete cytokines upon exposure to  
176 antigens. Therefore, we evaluated the cytokine production of the glyco-engineered CD70 nanoCAR T cells  
177 after challenging them with the THP-1 and SKOV-3 target cell lines (**Figure 2.C-E**). Target cells were co-  
178 incubated for 16 hours with MGAT5 KO CD70 nanoCAR T cells. Unstimulated cells were included as negative  
179 control and Immunocult stimulation was included as positive control. Subsequently, T cells were labelled  
180 for intracellular TNF- $\alpha$ , IFN- $\gamma$  and IL-2. The MGAT5 KO CD70 nanoCAR T cells are able to produce cytokines  
181 upon antigen stimulation and the proportion of cytokine-producing cells is similar to, or even higher than  
182 what is observed for mock nucleofected CD70 nanoCAR T cells. This cytokine expression is dependent on  
183 CD70 nanoCAR expression, given that non-transduced T cells (NTC) fail to express cytokines or express only  
184 very low levels in the presence of CD70 positive cells (but do show expression of cytokines after polyclonal  
185 Immunocult stimulation).

186 In order to evaluate the combined proliferative and cytotoxic potential of MGAT5 KO CD70 nanoCAR T  
187 cells, T cells were co-cultured with THP-1 target cells at different ratios for a period of 14 days. The number  
188 of THP-1 cells left in culture was determined by flow cytometry every three to four days. At day 7, a second  
189 challenge was performed by adding target THP-1 cells to the co-cultures. Results obtained with three  
190 independent T cell donors are depicted in **Figure 2.F-I**.

191 **Figure 2.F** and **G** shows the results corresponding to an effector/target (E/T) ratio of 0.15, that is 20 000  
192 THP-1 target cells co-cultured with 3000 CD70 nanoCAR effector cells. At this ratio, all target cells get killed  
193 by day 4, in the wild-type, mock engineered and MGAT5 KO CD70 nanoCAR T cell conditions (**Figure 2.F**).  
194 Even at a very low E/T ratio of 0.015 (20 000 target cells co-cultured with only 300 CD70 nanoCAR T cells),  
195 all target cells are eliminated by day 4, irrespective of the engineering condition (**Figure 2.H**).

196 Most interestingly, from day 11 onwards, at both E/T ratios the number of CD70 nanoCAR T cells is higher  
197 for those that are knockout in *Mgat5*, indicating a higher expansion of these glyco-engineered CAR T cells  
198 over time **Figure 2.G** and **I**. We found that, on day 11, the number of MGAT5 KO nanoCAR T cells is about  
199 1.74 times higher (95% CI: 1.36 to 2.21) than the number of nanoCAR T cells starting from the same  
200 conditions. On day 14, the number of MGAT5 KO nanoCAR T similarly is about 1.70 times higher (95% CI:  
201 1.33 to 2.18). All these estimates are averaged over the two E/T ratios and the three independent donors.

## 202 **Treatment of tumor-bearing mice with MGAT5 KO CAR T cells leads to a better outcome in terms of tumor** 203 **control**

204 After validating the *in vitro* activity of MGAT5 KO CD70 nanoCAR T cells, we aimed to evaluate whether  
205 MGAT5 KO CD70 nanoCAR T cells are also capable of clearing a tumor upon adoptive transfer *in vivo*.

206 The NOD.SCID IL2 $\gamma$ <sup>null</sup> (NSG) mouse strain has been widely used in the pre-clinical evaluation of CAR T cell  
207 efficacy. Immune-deficient NSG mice lack functional mouse T cells, B cells, NK cells and are deficient in  
208 cytokine signaling through the common  $\gamma$ C receptor<sup>21</sup>. Human tumor xenograft models were established  
209 in NSG mice by subcutaneous injection of luciferase-expressing SKOV-3 cells in the flank. Ten days after  
210 tumor cell inoculation, the presence of a subcutaneous tumor was evaluated by measurement with a slide  
211 caliper and through bioluminescent imaging (BLI) performed using an *in vivo* imaging system (IVIS).

212 After establishment of a solid, palpable tumor, mice were treated with either mock Cas9-engineered or  
213 MGAT5 KO CD70 nanoCAR respectively. As control groups, mice were treated with PBS to evaluate tumor  
214 development, or with non-transduced T cells (NTC) to evaluate graft versus host disease (GvHD) and non-  
215 specific anti-tumor effects. Throughout the experiment, tumor burden was measured every two days with  
216 a caliper and every 4 days through IVIS. A schematic representation of the experimental timeline is depicted  
217 in **Figure 3.A**.

218 At day 34, after the first phase of the experiment, the presence and phenotype of CAR T cells was evaluated  
219 in the blood and spleen. Furthermore, mice were followed-up in time and challenged between day 87 and  
220 day 90 with a second tumor to evaluate long-term anti-tumor efficacy. Again, tumor burden was evaluated  
221 over time and the mice were sacrificed between day 118 and day 123 for end-point analyses.

222 In the following sections, we will describe the results obtained for two independent experiments  
223 (Experiment A and Experiment B), which were performed with T cells from different donors. For the  
224 analysis, the treatment groups were divided in three treatment groups of interest: The 'No CAR' group  
225 contains the data from all the mice that did not receive any CD70 nanoCAR T cells, and thus includes  
226 untreated mice and mice treated with PBS or NTC. The 'CAR' group contains the data from all the mice that  
227 received a CD70 nanoCAR T cell treatment, with or without mock Cas9 engineering. The 'CD70 nanoCAR -  
228 MGAT5 KO' group contains data from the mice that received MGAT5 knockout CD70 nanoCAR T cells.

229 The outcome of the treatment was defined by 4 subtypes for the **primary tumor** challenge. (1) Full control  
230 meaning the tumor becomes undetectable and no relapse follows. (2) Full control but occurrence of a  
231 relapse later on. (3) Partial control meaning a halt in tumor growth but the tumor remains detectable and  
232 all mice also experience a relapse after long-term follow-up. (4) No control of tumor growth throughout  
233 the duration of the experiment.

234 As is clear from **Figure 3.B** and the table in **Figure 3.C**, the primary tumor is not controlled by the mice that  
235 did not receive CAR T cells, meaning that they were all sacrificed at the humane end-point. When we  
236 compare CD70 nanoCAR treated groups with MGAT5 KO CD70 nanoCAR treated groups, we see that more  
237 mice control tumor growth when they were treated with MGAT5 KO CD70 nanoCAR T cells, and that all of



238 these mice show full control, with or without relapse, of primary tumor growth. Contrary to this, a  
239 considerable number of mice in the CAR treated group show only partial or even no control at all of the  
240 primary tumor.

241 As opposed to experiment A, in which we did not observe any relapse of the primary tumor over time, the  
242 tumor did regrow in some of the treated mice in experiment B. A survival analysis was performed to  
243 evaluate whether a difference could be observed in either the number of relapses and the time of their  
244 onset between CD70 nanoCAR and MGAT5 KO CD70 nanoCAR T cell treated mice in experiment B  
245 (**Supplementary Figure 3**). When we look at the Kaplan-Meier curves, we indeed observe a difference. The  
246 CD70 nanoCAR group seems to have more relapses with an earlier onset in time, leading to a shorter  
247 median tumor free survival time of 55 days as compared to the MGAT5 KO CD70 nanoCAR treated group  
248 in which the median tumor free survival time is 72 days.

249 For the secondary tumor, we defined three types of tumor control as no relapse of tumor growth was  
250 observed in any of the mice that cleared the secondary tumor. (1) Full control meaning the tumor never  
251 develops or becomes undetectable after an initial growth phase. (2) Partial control meaning the tumor  
252 stops growing but remains detectable. (3) No control of tumor growth throughout the duration of the  
253 experiment.

254 As is clear from **Figure 3.B** and the table in **Figure 3.D**, MGAT5 knockout CD70 nanoCAR T cell treatment  
255 also lead to better tumor control after a secondary challenge. While the majority of the mice show no or  
256 only partial control of the secondary tumor in the CAR treated groups (52.9% in total), this image is shifted  
257 in the MGAT5 KO CAR treated groups (35% in total). In the latter, the majority of the mice completely clear  
258 the tumor before the end of the experiment (64% of the mice in total). In the mice that did not clear the  
259 secondary tumor completely, the majority of mice treated with the MGAT5 knockout CD70 nanoCAR T cells  
260 experienced partial control (21%) while the majority of mice treated with wild type CD70 nanoCAR T cells  
261 showed no control at all (47%).

### 262 **Treatment of tumor-bearing mice with MGAT5 KO CAR T cells leads to a better control of tumor growth rate**

263 To evaluate differences in tumor growth or resolution between the treated mice, a piecewise linear mixed  
264 model (with interactions) was fitted (see **Supplementary Figure 4** to **Supplementary Figure 8**) that allows to  
265 model the mean tumor volumes in each group. For these analyses, we made a distinction between  
266 Experiment A and Experiment B. The main reason for this is that the model would become unnecessarily  
267 complex because the timescales (design) of both experiments differ slightly as do the times at which the  
268 mice start to respond to the CAR T cell therapy. The latter is possibly due to inherent differences between  
269 the CAR T-cell batches (i.e. a donor effect).

270 In experiment A, we did not observe a difference in the speed of primary tumor resolution in mice treated  
271 with CD70 nanoCAR T cells and those treated with MGAT5 KO CD70 nanoCAR T cells (**Supplementary Figure**  
272 **4**). As even non-glyco-engineered CAR T cells already cleared the primary tumor in a very short time span,  
273 there was not much scope for improvement. However, when we look at the response to treatment in the  
274 secondary tumor (**Supplementary Figure 5**), differences were observed. While the secondary tumor in the  
275 untreated mice grows at 12% (95% CI +9% to +16%) per day (which is consistent with the primary tumor  
276 growth), the average growth rate in the CD70 nanoCAR T cell treated group is slower, only 3% per day (95%  
277 CI: -15% to +26%). When we look at the MGAT5 KO CD70 nanoCAR T cell treated group, the secondary  
278 tumor actually decreases with 10% (95% CI: -24% to +7%) each day, indicating that MGAT5 KO CD70  
279 nanoCAR T cells control tumor growth more efficiently in the secondary phase. However, due to the highly  
280 variable responses of individual mice in these groups, the difference in tumor growth rate between the  
281 MGAT5 KO CD70 nanoCAR T cell and nanoCAR T cell treated groups is therefore not statistically significant  
282 (ratio of growth rates: 95% CI = 0.67 to 1.13, adj. p-value = 0.505).

283 In experiment B, we do observe a difference in primary tumor clearance when we compare CD70 nanoCAR  
284 T cell treated mice with those that received MGAT5 KO CD70 nanoCAR T cells (**Supplementary Figure 6**).  
285 The primary tumor loses about half of its volume (49% with 95% CI: -53% to -45%) each day between day  
286 22 and 33 compared to 29% (95% CI: -41% to -24%) each day for the CD70 nanoCAR T cell group. This  
287 difference is statistically significant (tumor shrinkage rate in CD70 nanoCAR T cell treated group is only 72%  
288 of shrinkage rate in MGAT5 KO CD70 nanoCAR T cell treated group with a 95% CI of 0.59 to 0.86, adj. p-  
289 value <0.001). Moreover, while the primary tumor completely disappears in all mice in the MGAT5 KO  
290 CD70 nanoCAR T cell treated group in the subsequent part of the experiment (day 33 to about day 84), this  
291 is not the case for the CD70 nanoCAR cell treated group, where the tumor volume remaining at day 60 is  
292 5.07 mm<sup>3</sup> (95% CI: 0.32 to 80.07) on average. The confidence interval is quite wide, probably due to the  
293 large spread in the CD70 nanoCAR T cell treated group, where some mice clear the tumor completely, some  
294 partially and some not at all. Unlike what was observed in experiment A, some of the primary tumors did  
295 regrow in the course of the experiment B. From the analysis of these relapsed primary tumors shown in  
296 **Supplementary Figure 7**, it is clear that, although the tumor growth rate is the same, the tumor volume is  
297 significantly lower in the MGAT5 KO CD70 nanoCAR T cell treated group, as compared to the CD70 nanoCAR  
298 T cell treated mice.

299 The response of CD70 nanoCAR T cell therapy on a secondary tumor challenge in experiment B is  
300 summarized in **Supplementary Figure 8**. From day 101 onwards, we see that the tumor size in the MGAT5  
301 KO CD70 nanoCAR T cell treated group decreases with 10% each day (95% CI: -34% to +23%) , while the  
302 tumor size in the untreated and CD70 nanoCAR T cell treated groups increases with 9% (95% CI: +1% to  
303 +19%) and 6% (95% CI: -10% to +25%) daily respectively, again indicating that MGAT5 KO CD70 nanoCAR

304 T cells lead to a better tumor control after a secondary challenge. However, the difference in growth rate  
305 between CD70 nanoCAR T cell treated mice and MGAT5 KO CD70 nanoCAR T cell treated mice is not  
306 statistically significant (growth speed in MGAT5 KO CD70 nanoCAR T treated mice is 0.85 times the growth  
307 rate in CD70 nanoCAR T cell treated mice, 95% CI 0.59 to 1.22). This is most probably due to the large  
308 variability and relatively few available mice within the treatment groups.

### 309 **MGAT5 KO CD70 nanoCAR T cells are present in higher numbers than CD70 nanoCAR T in peripheral blood** 310 **and spleen following tumor control**

311 End-point analysis on day 34 was performed on peripheral blood (both experiments) and spleen  
312 (experiment A) by flow-cytometry (**Figure 4-A,B,F**). Human CD3<sup>+</sup> T cells were detected in blood and spleen  
313 of mice treated with mock Cas9 or MGAT5 KO CD70 nanoCAR T cells and around 75% of these cells were  
314 found to be CD70 nanoCAR T cells (data not shown), based on GFP expression. The number of MGAT5 KO  
315 CD70 nanoCAR T cells in the spleen (**Figure 4-B**) and blood (**Figure 4-F**) is markedly increased as compared  
316 to mock Cas9 CD70 nanoCAR T cells. We did not analyze splenocytes on day 34 in experiment B, since we  
317 kept all mice for rechallenge, enabling statistics on larger groups. CAR T cells were still present in the blood  
318 at day 80 (**Figure 4-C,G**). We see a trend of higher numbers of MGAT5 KO CD70 nanoCAR T cells compared  
319 to CD70 nanoCAR T cells, mostly pronounced in experiment B, however, the difference is not statistically  
320 significant. End-point analysis between day 118 and day 123 was performed on peripheral blood and spleen  
321 (**Figure 4-E,I**). Similarly, in both experiments we measure higher numbers of MGAT5 KO CD70 nanoCAR T  
322 cells compared to CD70 nanoCAR T cells, however, the difference is not statistically significant.

## 323 **Discussion**

324 In this paper, we described the impact of cell surface glycosylation alterations on T cell fate and functions  
325 through MGAT5 KO induced in CD70 nanoCAR T cells. As the alteration of cellular glycosylation has an  
326 impact on multiple cell surface receptors and their signal transduction, we measured the integrated results  
327 of all of these alterations on cellular behavior, both *in vitro* and *in vivo*.

328  $\beta$ 1,6-N-acetylglucosaminyltransferase-V (MGAT5) is the enzyme responsible for the initiation of GlcNAc- $\beta$ -  
329 (1,6)-branching on N-glycans and is involved in multiple aspects of T cell activation.  $\beta$ -(1,6)-N-glycan  
330 branching leads to an increase in LacNAc modifications, the ligand of Galectins. It has been demonstrated  
331 that absence of *Mgat5* and thus a decrease in LacNAc, lowers T cell activation thresholds *in vitro* by  
332 enhancing TCR clustering due to the absence of Galectin-glycoprotein lattice formation<sup>22,23</sup>. This Galectin-  
333 mediated lattice is responsible for holding CD45 and the TCR signaling complex in close proximity via their  
334 O- and N-linked glycans (respectively) to prevent low-avidity T cell activation<sup>24</sup>. Greco *et al.* recently  
335 demonstrated, by knockout of *Mgat5* in pancreatic adenocarcinoma, that N-glycans protect tumors from  
336 CAR T cell killing by interfering with proper immunological synapse formation and reducing transcriptional

337 activation, cytokine production and cytotoxicity<sup>25</sup>. It is known MGAT5 is a primary target of the Golgi-  
338 resident intramembrane protease Signal peptide peptidase-like 3 (SPPL3)<sup>26</sup>. Along the same line as  
339 described by Greco *et al.*, Heard and colleagues identified expression of SPPL3 in malignant B cells as a  
340 potent regulator of resistance to CAR therapy<sup>27</sup>.

341 An increased incidence of autoimmune disease is seen in the absence of *Mgat5 in vivo*<sup>19</sup>. Furthermore,  
342 negative regulation of TCR signaling by  $\beta$ 1,6-GlcNAc-containing *N*-glycans promotes development of Th2  
343 over Th1 responses, enhances Th2 polarization, and suggests a mechanism for the increased autoimmune  
344 disease susceptibility observed in *Mgat5*<sup>-/-</sup> mice<sup>28</sup>. On the other hand, *Mgat5* expression can be induced by  
345 the anti-inflammatory cytokine IL-10, decreasing antigen sensitivity of CD8<sup>+</sup> T cells during chronic  
346 infection<sup>29</sup>.

347 Our results indicate that MGAT5 KO CD70 nanoCAR T and CD70 nanoCAR T largely behave in the same way  
348 as control cells *in vitro*; MGAT5 elimination had no clear impact on T cell activation or viability.  
349 Furthermore, anti-tumor cell responses by MGAT5 KO CD70 nanoCAR T cells were maintained *in vitro* and  
350 very interestingly, our results indicate that MGAT5 KO nanoCAR T cells show enhanced anti-tumor potential  
351 and control upon a primary and secondary tumor challenge, as compared to mock engineered CAR T cells.  
352 In the case of very potent CAR T cells (cfr in experiment A), the improved protective effect of MGAT5 KO  
353 CD70 nanoCAR T cells over CD70 nanoCAR T cells seems to be more pronounced upon rechallenge,  
354 however, when CAR T cells are less potent (cfr in experiment B), enhanced capability seems to be more  
355 explicit in clearance of the primary tumor. Notably, increased numbers of MGAT5 KO CD70 nanoCAR T cells  
356 were observed upon specific antigen recognition, both *in vitro* and *in vivo*.

357 It was previously shown that the inhibition of binding to LacNAc glycans via competitive inhibition with  
358 carbohydrate analogs increased the number of infiltrating tumor-specific T cells<sup>30</sup>. In a recent study by Ye  
359 *et al.*<sup>31</sup>, MGAT5 was discovered as one of the top hits in a CRISPR screen in murine CD8<sup>+</sup> T cells in a syngeneic  
360 model of glioblastoma in immunocompetent mice. MGAT5 knockout enhanced the efficacy of adoptive T  
361 cell transfer against glioblastoma in mice with both immunocompetent and antigen-specific transgenic TCR  
362 models in terms of increased tumor infiltration and overall survival of tumor bearing mice.

363 A possible explanation for the higher numbers of MGAT5 KO CD70 nanoCAR T cells compared to control  
364 CD70 nanoCAR T cells, could be that MGAT5 KO CAR T cells are less susceptible to Galectin-3-mediated  
365 apoptosis. We already confirmed Galectin-3 overexpression by the tumor cell lines used in our models and  
366 we are currently evaluating whether Galectin-3 binding to MGAT5 KO (CAR) T cells is indeed reduced. To  
367 capture the transcriptional programs that are differentially regulated between glyco-engineered and wild  
368 type CAR T cells, we will perform transcriptome profiling by bulk mRNA sequencing on cells that are  
369 cultured in the absence and presence of antigen expressing cells. Gene set enrichment and pathway

370 analyses can then reveal a signature of gene upregulation or downregulation specific to knockout cell  
371 populations<sup>32</sup>. Results of this experiment are expected soon.

372 Taken together, it is clear from our data that disruption of N-glycosylation modifications on CAR T cells can  
373 have a major impact on their antitumor efficacy, and thus might have important implications for future  
374 design of cell-based immunotherapies.

## 375 **Materials and methods**

### 376 **Ethical approval**

377 All experiments were approved and performed according to the guidelines of the ethical committee  
378 Medical Ethics of Ghent University, Belgium.

379 The breeding of NSG mice is covered by file E-726 and animal experiments are covered by file EC2020-009.

### 380 **Cell lines**

381 THP-1 cells were obtained from ATCC and cultured in RPMI medium (Gibco) supplemented with 10% fetal  
382 calf serum (FCS), 0.03% L-Gln, 0.4 mM sodium pyruvate and 50  $\mu$ M  $\beta$ -mercaptoethanol. SKOV-3 cells  
383 expressing luciferase were kindly provided by Prof. De Wever (Ghent University, Faculty of Medicine and  
384 Health Sciences) and were cultured in DMEM medium (Gibco) supplemented with 10% FCS and 1%  
385 penicillin/streptomycin. Jurkat cells were obtained from ATCC and were cultured in RPMI medium (Gibco)  
386 supplemented with 10% FCS, 2mM L-Gln and 0.4 mM sodium pyruvate. All cell lines were maintained in a  
387 37°C, 5% CO<sub>2</sub>, fully humidified incubator and passaged twice weekly.

### 388 **Human CD3<sup>+</sup> T cell isolation and culturing**

389 Leukocyte-enriched buffy coat samples were obtained from healthy donors attending the Red Cross center  
390 after informed consent and ethical committee approval (EC2019-1083). Peripheral blood lymphocytes  
391 were prepared by a Ficoll-Paque density centrifugation as described in the instruction manual for  
392 Leucosep<sup>TM</sup> (Greiner bio-one). CD3<sup>+</sup> T cells were isolated by negative selection with antibodies against  
393 CD14, CD15, CD16, CD19, CD36, CD56, CD123 and CD235 (MojoSort<sup>TM</sup> Human CD3 T cell selection kit,  
394 Biolegend) according to the manufacturer's protocol. Cells were cultured in IMDM + Glutamax medium  
395 (Gibco-BRL) supplemented with 10% heat-inactivated FCS and stimulated with Immunocult<sup>TM</sup> Human  
396 CD3/CD28 T cell Activator (Stemcell Technologies) (25  $\mu$ L/ 10<sup>6</sup> cells) for 3 days at 37°C in the presence of  
397 10 ng/ mL IL-12 (Biolegend).

398 Prior to cell seeding, cells were washed twice with PBS before putting them in culture with rhIL-7 at  
399 10ng/mL (Miltenyi) and rhIL-15 at 10 ng/mL (Miltenyi). Cytokines and medium were replaced every 2-3  
400 days. Cell densities were maintained between 1 x 10<sup>6</sup> and 3 x 10<sup>6</sup> cells/ mL.

## 401 **Guide RNA**

402 We designed gRNAs using the Synthego design tool  
403 (<https://www.synthego.com/products/bioinformatics/crispr-design-tool>). Guides were ordered as  
404 chemically modified synthetic sgRNAs (with 2'-O-Methyl at 3 first and 3 last bases and 3' phosphorothioate  
405 bonds between first 3 and last 2 bases) and reconstituted at 100  $\mu$ M in TE buffer. An overview of the guides  
406 used in this study can be consulted in **Supplementary Figure 2.A**.

## 407 **RNP electroporation**

408 Recombinant Cas9-GFP protein was purchased from the VIB protein core (<https://vib.be/labs/vib-protein-core>). Cas9 RNP was made by incubating Cas9 protein with sgRNA at a molar ratio of 1:2 at 37°C for 15 min  
409 immediately prior to electroporation in T cells. Electroporation was performed using the Lonza Amaxa 4D  
410 Nucleofector X unit (Program EH-115) and the P3 primary cell kit with the following conditions:  $1 \times 10^6$   
411 cells/20  $\mu$ L P3 buffer per cuvette (16-well strips) with 20  $\mu$ M Cas9-RNP. Following nucleofection, 80  $\mu$ L pre-  
412 warmed medium was added per well and cells were allowed to rest for 30 mins at 37°C, 5% CO<sub>2</sub>.  
413

## 414 **Analysis of genome editing efficiency**

415  $0.1 \times 10^6$  cells were collected and lysed in QuickExtract™ (Lucigen Epicentre) according to the supplier's  
416 instructions. The target site was amplified by PCR and Sanger Sequenced. Sequencing data was analyzed  
417 with the ICE tool (Inference of CRISPR Edits, Synthego) to infer the percentage of insertions and deletions  
418 (INDEL score) and the percentage of insertions and deletions that are out of frame (knock out (KO) score)<sup>33</sup>.

## 419 **Production of retroviral vectors**

420 Retroviral constructs encoding the nanoCAR sequences were previously cloned in the LZRS-IRES-eGFP  
421 vector and were obtained from Prof. Dr. Bart Vandekerckhove (Department of Diagnostic Sciences, Ghent  
422 University, 9000 Ghent, Belgium). Viral particles were produced using standard Ca<sub>3</sub>(PO<sub>4</sub>)<sub>2</sub> transfection of  
423 the Phoenix amphi packaging cell line. Retroviral supernatant was collected at day 14 after transfection  
424 and puromycin selection and kept at -80°C until use.

## 425 **Generation of CD70 nanoCAR Expressing Human T cells**

426 Immunocult-stimulated human CD3<sup>+</sup> T cells were retrovirally transduced on Retronectin-coated plates  
427 (TaKaRa). 500  $\mu$ L of cells per well at  $0.5 \times 10^6$  cells/mL were supplemented with 0.5 mL retroviral  
428 supernatant and centrifuged for 90 minutes at 900 g at 32°C. Transduced cells were detected by eGFP  
429 expression or by an anti-VHH antibody (Genscript) directed against the nanobody constituting the  
430 extracellular domain of the CAR and analyzed by flow cytometry.

#### 431 **Lectin-based flow cytometry**

432 For the evaluation of the poly-LacNAc content on the cell surface, we used the lectin from *Datura*  
433 *stramonium* at a staining concentration of 10 µg/ mL (Biotinylated DSL, Vector laboratories, B-1185-2). 2 x  
434 10<sup>5</sup> cells per condition were collected and rinsed three times with PBS. Cells were incubated with fixable  
435 viability dye eFl780 (eBioscience) and biotinylated lectin in lectin binding buffer (PBS with 0.1 mM CaCl<sub>2</sub>)  
436 for 30 minutes at 4°C. After rinsing with lectin binding buffer, cells were incubated with PE-coupled  
437 neutravidin (Invitrogen, 5 µg/mL) for 30 minutes at 4°C. After rinsing the cells with PBS, samples were  
438 resuspended and analyzed by flow cytometry. A minimum of 50 000 events was recorded.

#### 439 **PNGaseF digest**

440 In order to prepare cell surface N-glycans for DSA-FACE analysis, 1 x 10<sup>6</sup> cells were collected per condition  
441 and washed three times with PBS to reduce the presence of medium-derived glycans. Cell culture medium  
442 was collected for N-glycan labeling. PNGaseF digest (0.125 IU/ 1x10<sup>6</sup> cells, in-house production) was  
443 performed in 25 µL final volume in PBS for 2 hours at 37°C. Cells were removed by centrifugation (5 min at  
444 300g) and the supernatant was subjected to another centrifugation step (15 min at 15 000 rpm) to remove  
445 cell debris. The remaining liquid portion of the sample was stored at -20°C until APTS labeling and DSA-  
446 FACE analysis.

#### 447 **N-glycan analysis using DSA-FACE**

448 The remaining N-glycan samples were labelled by adding an equal volume (20 µL) of labeling mix  
449 consisting of a 1/1 v/v mix of 1M morpholine borane in 20% DMSO, 20% SDS and 4M Urea mixed with  
450 350 mM APTS in 2.4M citric acid and 14% SDS immediately prior to labeling. The labeling reaction was  
451 incubated at 70°C for 1 hour and allowed to cool down at 4°C before purification. Size exclusion  
452 chromatography (Sephadex G-10 resin with an exclusion limit of 700 Da prepared in a 96-well setup in  
453 Multiscreen-Durapore plates) was performed twice to desalt the samples and to remove free unreacted  
454 APTS<sup>34</sup>. The labeled glycans were then dried in a speedvac.

455 Purified labelled and dried N-glycans were resuspended in 10 µL ultrapure water and analyzed with  
456 capillary electrophoresis on an eight-capillary DNA sequencer (Applied Biosystems 3500 Genetic analyzer).  
457 A proprietary internal standard (GlyXera) was added to the samples to be able to align profiles from  
458 different samples. Samples were injected on a 50 cm capillary at 15 kV for 10 seconds, using POP7 polymer  
459 and 100 mM TAPS, pH 8,0, containing 1 mM EDTA as the running buffer. N-glycan profiles were analyzed  
460 through the Genemapper 6 software.

## 461 **Flow cytometry analysis**

462 Flow cytometry analysis was performed on  $0.2 \times 10^6$  cells per sample collected in a 96-well V bottom plate.  
463 Cells were rinsed with FACS buffer (PBS containing 0.5% BSA and 2mM EDTA) for 3 min at 300g and  
464 incubated with Fc Receptor Blocking solution (Human TruStain FcX™, Biolegend) for 10 minutes prior to  
465 cell surface staining with fluorescently labeled antibodies in Brilliant Stain buffer (BD Biosciences) for 30  
466 minutes at 4°C.

467 For human CD3<sup>+</sup> T cell phenotyping, cells were labeled with fluorescent antibodies against human CD8,  
468 CD62L and CD45RA (BD Biosciences) and CD3, CD4, CD25, CD69, and CD279 (PD-1) (Biolegend). A Fixable  
469 dye eFluor™ 780 (eBioscience) was used to evaluate live/dead cells.

470 Flow cytometer calibration was performed using CS&T beads (BD Biosciences). The gating strategy was set  
471 based on fluorescence minus one (FMO) controls and retained for all samples. Jurkat, THP-1 and SKOV-3  
472 cell lines and primary human T cells were labeled with fluorescent antibody against human CD70 or isotype  
473 control (Biolegend) to verify antigen expression as described before<sup>35</sup>.

474 Galectin expression by tumor cell lines was evaluated by cell surface staining with a fluorescent antibody  
475 against Galectin-3 and an antibody against Galectin-1. The latter was detected by a fluorescent anti-goat  
476 antibody. As a positive control, cells were incubated with 200 µg/mL recombinant Galectin-1 and Galectin-  
477 3 (Biolegend). Galectin binding was competitively inhibited by adding 50 mM lactose during the staining  
478 procedure.

479 In all analyses, following doublet exclusion, live cells were identified using a fixable viability dye (Molecular  
480 Probes, Life Technologies). Data were acquired on a BD Symphony A5 equipped with five lasers (355, 405,  
481 488, 561, 640nm) (BD Biosciences) and analyzed using FlowJo software (Tree Star, Ashland, OR).

## 482 ***In vitro* analysis of cytokine production**

483 Glyco-engineered CD70 nanoCAR T cells were stimulated *in vitro* by co-incubation with THP-1 or SKOV-3  
484 tumor cell lines expressing CD70 in a 96-well plate in duplicate. After 1 hour of co-incubation, BD GolgiPlug  
485 (BD Biosciences) was added and after an additional 15 hours of stimulation, the cells were harvested,  
486 labelled with fluorescent antibodies against CD3, CD4 and CD8, fixed and permeabilized (eBioscience) and  
487 labelled for intracellular expression cytokines with fluorescent antibodies against TNF-α (BD Biosciences),  
488 IFN-γ and IL-2 (Biolegend). Samples were analyzed by flow cytometry as described above.



489 ***In vitro* analysis of tumor cell killing**

490 Glyco-engineered CD70 nanoCAR T cells were incubated with  $2 \times 10^4$  THP-1 cells at different effector/target  
491 ratios (0; 0.0015; 0.015 and 0.15) in IMDM medium with Glutamax (Gibco) containing 10% FCS and 1%  
492 penicillin/streptomycin. Cells were labelled with fluorescent antibodies against CD3, CD4 and CD8 for the  
493 analysis of T cells and CD33 for the analysis of THP-1 cells at the start of the co-culture (day 0) and at day  
494 3, 7, 10 and 14. At day 7 of co-culture,  $2 \times 10^4$  THP-1 cells were added to the remaining wells. Cell numbers  
495 were determined by flow cytometry.

496 ***In vivo* analysis of glyco-engineered CD70 nanoCAR T cell efficacy**

497 NSG mice (breeder pairs obtained from The Jackson Laboratory, breeding in house) between 8-12 weeks  
498 of age were subcutaneously (in the flank) injected with  $2 \times 10^6$  SKOV-3 cells in 50  $\mu$ L PBS. The cells were  
499 allowed to form a solid mass tumor and CD70 nanoCAR T cells were intravenously injected on day 13 (in  
500 200  $\mu$ L total volume in PBS). Body weight and tumor progression was followed up by caliper and  
501 bioluminescence imaging (BLI). A dose of 150 mg/kg D-luciferin potassium salt (Perkin Elmer) was injected  
502 intraperitoneally 10 minutes before BLI. Imaging data were analyzed using Living Image Software and  
503 reported as photons/second. In experiment A, we started with 6 mice in the PBS and NTC group and 12  
504 mice in the CD70 nanoCAR mock Cas9/MGAT5KO groups. At day 34, all control mice and 6 mice from the  
505 CD70 nanoCAR mock Cas9/MGAT5KO groups were sacrificed for analysis. The other 6 mice from the CD70  
506 nanoCAR mock Cas9/MGAT5KO groups were kept for rechallenge. In experiment B, we started with 6 mice  
507 in the PBS and NTC group and 9 mice in the CD70 nanoCAR mock Cas9/MGAT5KO groups. All mice were  
508 kept for rechallenge, unless humane endpoint was reached (control mice). At the start of each experiment,  
509 we also kept a group of 8 (experiment A) or 6 (experiment B) mice to be used as a control (=PBS) group in  
510 the rechallenge phase of the experiment, to ensure age-matched controls.

511 **End-point analysis on spleen and blood**

512 At indicated time points, mice were euthanized. Peripheral blood was collected following severing of the  
513 right atrium of the heart and transferred to EDTA coated Microvettes (Sarstedt). The volume of blood was  
514 determined and red blood cells were removed using ammonium-chloride-potassium (ACK) lysis buffer  
515 (Lonza) prior to antibody staining for flow cytometry analysis.

516 The spleen was collected and processed to a cell suspension through a 70  $\mu$ M cell strainer. Erythrocytes  
517 were removed using ACK lysis buffer followed by washes. Cells were counted prior to antibody staining for  
518 flow cytometry analysis.

519 Tumors were isolated from non-treated controls and fixed in 4% PFA. Subsequently, tumor tissue was  
520 embedded in paraffin for downstream immunohistochemistry analysis.

## 521 Immunohistochemistry and microscopic analysis of galectin expression in tumor tissue

522 Immunofluorescent staining was performed on 4  $\mu\text{m}$  thick formalin-fixed, paraffin embedded (FFPE)  
523 sections of tumor samples from untreated mice. After antigen retrieval using citrate buffer pH 6 (Vector,  
524 H-3300), sections were incubated with 1% goat serum in PBS + 0.5% BSA + 0.1% Tween20 for 30 minutes  
525 to block non-specific binding. Subsequently, monoclonal rabbit anti-galectin-1 (1:200, Cell Signaling,  
526 13888S) or monoclonal rabbit anti-galectin-3 (1:200, Cell Signaling, 87985S) diluted in 1% w/v goat serum  
527 in PBS + 0.5% BSA + 0.1% Tween20 were incubated at overnight at 4°C. Alexa Fluor 568 labelled goat anti-  
528 rabbit (1:500, Thermofisher, A11036), was incubated at room temperature for two hours. Counterstaining  
529 was performed using DAPI (1:1000). Slides were mounted using 1% n-propyl-gallate in glycerol (pH7).  
530 Images of the galectin staining were acquired with a LSM880 confocal microscope (Zeiss) and analyzed  
531 through ZEN Microscopy Software (Zeiss).

## 532 Statistical analysis *in vitro* experiments assessing tumor cell killing

533 To analyze the data of the coculture experiment, we started from flow cytometry-based count data. Since  
534 the counts had been normalized using counting beads, they were not necessarily integers so we rounded  
535 all to the closest integer. We considered each setup with the same donor, E/T Ratio and type of CAR T cells  
536 (i.e. CD70 nanoCAR or CD70 nanoCAR MGAT5 KO) as a cluster. Since we had two measurements (repeats)  
537 at each day and the measurements were performed at day 0, 4, 7, 11 and 14, this means we had 10  
538 measurements in each cluster. Furthermore, we observed a slight rise in the counts of the NTC cells over  
539 time in the control setups. We corrected the CAR T cell counts for this background (per cluster and at each  
540 timepoint) by subtracting the mean background count from the measurements.

541 We analyzed the background-corrected counts with a generalized linear mixed model (GLMM) to allow for  
542 modeling the within-cluster correlation over time. Since the data showed considerable overdispersion, we  
543 used a negative binomial model. The GLMMadaptive package<sup>36</sup> allows to fit such a model in R<sup>37</sup> using  
544 adaptive Gaussian quadrature (AGQ). We did not have enough data to fit a random slope model, so we  
545 settled for a random intercept model of the following form:

$$546 \text{Count} \sim \text{fDay} * (\text{Group} + \text{Donor} + \text{ETRatio}) + \text{Group} * \text{Donor} + (1 | \text{cluster})$$

547 In this model, all fixed effects are coded as a factor. We chose to also model the time variable as a factor  
548 since the log-transformed counts are not linear with time. The model fit was evaluated using the DHARMA  
549 package<sup>38</sup> and contrasts were estimated using the multcomp package<sup>39</sup>.

## 550 Statistical analyses *in vivo* experiments

### 551 *Multinomial logistic regression*

552 We analyzed the distributions of outcomes for the primary and secondary tumors in the different groups  
553 of mice. To do so, we first had to define several possible outcomes. For the primary tumor, there are four

554 possible outcomes: - Full control of the tumor, meaning that the tumor becomes undetectable both by  
555 caliper measurement and on BLI, and also no relapse. - Full control of the tumor but with a relapse after a  
556 period of the tumor being undetectable. - Partial control, meaning that the tumor stops growing but  
557 remains detectable, all these mice also had a relapse. - No control of tumor meaning that the tumor  
558 continually keeps growing. For the secondary tumor we only have full control, partial control or no control.  
559 The follow up time was not long enough to also consider relapses. To analyze these data in R<sup>37</sup>, we used  
560 multinomial logistic regression (with a proportional odds assumption) as implemented in the polr function  
561 of the MASS package<sup>40</sup>. We analyzed the outcomes of experiments A and B together making experiment  
562 an additional predictor apart from group. Using likelihood ratio testing, we tested for an interaction effect  
563 between experiment and group and found that this was not significant in the primary nor secondary tumor.  
564 We used the multcomp package<sup>39</sup> to calculate contrast estimates with 95% confidence intervals. We also  
565 used the ggpredict function from the ggeffects package<sup>41</sup> to calculate experiment-wise predictions with  
566 95% confidence intervals for the predicted outcomes.

#### 567 *Survival analysis (time to relapse)*

568 To analyze the time to relapse, we first defined the start of follow up as the moment the primary tumor  
569 was controlled or partially controlled. We define control as the first day the tumor became completely  
570 undetectable on BLI and by caliper measurement. We define partial control as the first day a tumor (that  
571 never fully disappears) stopped increasing in size according to caliper measurements. Next, we define a  
572 relapse event as the moment a tumor starts growing again. We take the last day before the tumor has  
573 increased in size again or became detectable again as the onset of relapse. The time to event is then the  
574 time between start of follow up and a relapse event and the follow up time is the time between start of  
575 follow up and either an event or the end of follow up in case of no relapse. We used R<sup>37</sup> with the survival<sup>42,43</sup>  
576 and survminer<sup>44</sup> packages to generate Kaplan-Meier plots with estimates of the median survival times and  
577 a corresponding risk and events table. Since relapses were only observed in experiment B, we ran a  
578 straightforward analysis with group as the only predictor (groups: CD70 nanoCAR or CD70 nanoCAR -  
579 MGAT5 KO). We tested for the difference in survival probability in these groups with a logrank test as  
580 implemented in the survival package.

#### 581 *Longitudinal analyses*

582 Tumor volumes were measured by measuring the length and width of a tumor and using the length\*  
583 width\*width/2 (this is a half cube or cuboid) approximation of the volume of a sphere. The smallest tumor  
584 length/width that can be reliably measured with a caliper is about 0.5 cm. The minimal tumor volume that  
585 can be calculated in this way is  $0.5*0.5*0.5/2 = 0.0625 \text{ cm}^3$  (which can be regarded as the limit of  
586 quantification). We also cross-checked with BLI data for the small tumors, since this gives a better  
587 indication on whether there actually is still a tumor present or not. Whenever a small tumor was measured

588 or a zero volume was registered, BLI was used to verify whether a tumor was actually present or not and  
589 the caliper measurements were adapted accordingly: when no tumor was found on BLI, we set small caliper  
590 measurements to zero and when a tumor was found on BLI but not measured by caliper, we set the tumor  
591 volume to 0.5. Uncontrolled tumor growth is exponential so we log-transformed (with a base 2 log) all  
592 tumor volume data to simplify the mean structures of the fitted models and to correct for the mean-  
593 variance relationship we observed during data exploration. To avoid problems when the tumor volume is  
594 zero, we first added 0.0625 (the detection limit) to all volumes before log-transforming. We then analyzed  
595 the transformed data of each experiment (A and B) and each phase (primary tumor before and after  
596 rechallenge and secondary tumor) separately by fitting a linear mixed model to each using the lme4  
597 package<sup>45</sup> and the nlminb fitting algorithm from the optimx package<sup>46</sup> in R<sup>37</sup>. Where needed, we used piece-  
598 wise linear models with up to two knots for the time variable to allow for changes in growth rate over time.  
599 Random effects included a per-mouse random intercept and one or more random slopes for the time  
600 variable to model within-mouse correlation over time. For each model, we started with mean and  
601 covariance structures that were as saturated as possible based on the available data. Pruning the models  
602 was done via likelihood ratio testing first using Residual maximum likelihood (REML) to test for the random  
603 effects and then maximum likelihood (ML) to test for fixed effects. The final models were fitted using REML.  
604 In all models, we observed residual heteroscedasticity, even with the log-transformed data, so we used  
605 robust covariance estimators from the clubSandwich package<sup>47</sup> (vcovCR, type 'CR0') in conjunction with  
606 the multcomp package<sup>39</sup> to calculate adjusted p-values and/or adjusted 95% confidence intervals for  
607 parameters and contrasts.

## 608 **Acknowledgements**

609 NF and LM were staff scientists of VIB. EDB was a predoctoral fellow at FWO during the project and has  
610 currently a doctor-assistant mandate at UGhent. EP was a research associate of VIB, AVH and EW are  
611 research associates of UGhent. This work was supported by grants G050420N and G028220N of FWO  
612 Vlaanderen and by a Young Investigator Proof of Concept (YIPOC) grant of the Cancer Research Institute  
613 Ghent (CRIG). We are grateful to M. Goossens and L. De Pryck for help with the caliper/IVIS measurements,  
614 splenocyte preparations and collecting SKOV3 cells. We thank Prof. Dr. Y. Chen (Parker Institute for Cancer  
615 Immunotherapy Center at UCLA, Los Angeles, CA, USA) for intensive experimental training in the CAR T  
616 field. We thank the VIB Bioimaging core Ghent (<https://vib.be/labs/vib-bioimaging-core-ghent>) and VIB  
617 Flow Core (<https://vib.be/labs/vib-flow-core-ghent>) facilities for their services.

618 **Declaration of interest statement**

619 EDB, NF and NC are co-inventors on a PCT International Patent application (PCT/EP2022/086474) by the  
620 VIB and Ghent University, which incorporate discoveries and inventions described here. All the other  
621 authors declare no conflict of interest.

622 **References**

- 623 1. De Bousser E, Callewaert N, Festjens N. T Cell Engaging Immunotherapies, Highlighting Chimeric  
624 Antigen Receptor (CAR) T Cell Therapy. *Cancers* 2021; 13:6067.
- 625 2. Vairy S, Garcia JL, Teira P, Bittencourt H. CTL019 (tisagenlecleucel): CAR-T therapy for relapsed and  
626 refractory B-cell acute lymphoblastic leukemia. *Drug Des Devel Ther* 2018; 12:3885–98.
- 627 3. Reagan PM, Friedberg JW. Axicabtagene ciloleucel and brexucabtagene autoleucel in relapsed and  
628 refractory diffuse large B-cell and mantle cell lymphomas. *Future Oncol Lond Engl* 2021; 17:1269–83.
- 629 4. Liu L, Qu Y, Cheng L, Yoon CW, He P, Monther A, Guo T, Chittle S, Wang Y. Engineering chimeric antigen  
630 receptor T cells for solid tumour therapy. *Clin Transl Med* 2022; 12:e1141.
- 631 5. De Bousser E, Meuris L, Callewaert N, Festjens N. Human T cell glycosylation and implications on  
632 immune therapy for cancer. *Hum Vaccines Immunother* 2020; 16:2374–88.
- 633 6. Okada M, Chikuma S, Kondo T, Hibino S, Machiyama H, Yokosuka T, Nakano M, Yoshimura A. Blockage  
634 of Core Fucosylation Reduces Cell-Surface Expression of PD-1 and Promotes Anti-tumor Immune  
635 Responses of T Cells. *Cell Rep* 2017; 20:1017–28.
- 636 7. Alegre ML, Frauwirth KA, Thompson CB. T-cell regulation by CD28 and CTLA-4. *Nat Rev Immunol* 2001;  
637 1:220–8.
- 638 8. Lau KS, Partridge EA, Grigorian A, Silvescu CI, Reinhold VN, Demetriou M, Dennis JW. Complex N-Glycan  
639 Number and Degree of Branching Cooperate to Regulate Cell Proliferation and Differentiation. *Cell*  
640 2007; 129:123–34.
- 641 9. Demotte N, Wieërs G, Van Der Smissen P, Moser M, Schmidt C, Thielemans K, Squifflet J-L, Weynand  
642 B, Carrasco J, Lurquin C, et al. A galectin-3 ligand corrects the impaired function of human CD4 and  
643 CD8 tumor-infiltrating lymphocytes and favors tumor rejection in mice. *Cancer Res* 2010; 70:7476–88.
- 644 10. Clemente T, Vieira NJ, Cerliani JP, Adrain C, Luthi A, Dominguez MR, Yon M, Barrence FC, Riul TB,  
645 Cummings RD, et al. Proteomic and functional analysis identifies galectin-1 as a novel regulatory  
646 component of the cytotoxic granule machinery. *Cell Death Dis* 2017; 8:e3176.
- 647 11. Wang H, Kaur G, Sankin AI, Chen F, Guan F, Zang X. Immune checkpoint blockade and CAR-T cell  
648 therapy in hematologic malignancies. *J Hematol Oncol J Hematol Oncol* 2019; 12:59.
- 649 12. Yu F, Finley RL, Raz A, Kim H-RC. Galectin-3 translocates to the perinuclear membranes and inhibits  
650 cytochrome c release from the mitochondria. A role for synexin in galectin-3 translocation. *J Biol Chem*  
651 2002; 277:15819–27.
- 652 13. Kouo T, Huang L, Pucsek AB, Cao M, Solt S, Armstrong T, Jaffee E. Galectin-3 shapes antitumor immune  
653 responses by suppressing CD8+ T cells via LAG-3 and inhibiting expansion of plasmacytoid dendritic  
654 cells. *Cancer Immunol Res* 2015; 3:412–23.

- 655 14. Stillman BN, Hsu DK, Pang M, Brewer CF, Johnson P, Liu F-T, Baum LG. Galectin-3 and galectin-1 bind  
656 distinct cell surface glycoprotein receptors to induce T cell death. *J Immunol Baltim Md 1950* 2006;  
657 176:778–89.
- 658 15. Chen H-Y, Fermin A, Vardhana S, Weng I-C, Lo KFR, Chang E-Y, Maverakis E, Yang R-Y, Hsu DK, Dustin  
659 ML, et al. Galectin-3 negatively regulates TCR-mediated CD4+ T-cell activation at the immunological  
660 synapse. *Proc Natl Acad Sci U S A* 2009; 106:14496–501.
- 661 16. Kaur M, Kumar D, Butty V, Singh S, Esteban A, Fink GR, Ploegh HL, Sehrawat S. Galectin-3 Regulates  $\gamma$ -  
662 Herpesvirus Specific CD8 T Cell Immunity. *iScience* 2018; 9:101–19.
- 663 17. Petit A-E, Demotte N, Scheid B, Wildmann C, Bigirimana R, Gordon-Alonso M, Carrasco J, Valitutti S,  
664 Godelaine D, van der Bruggen P. A major secretory defect of tumour-infiltrating T lymphocytes due to  
665 galectin impairing LFA-1-mediated synapse completion. *Nat Commun* 2016; 7:12242.
- 666 18. Demotte N, Stroobant V, Courtoy PJ, Van Der Smissen P, Colau D, Luescher IF, Hivroz C, Nicaise J,  
667 Squifflet JL, Mourad M, et al. Restoring the Association of the T Cell Receptor with CD8 Reverses Anergy  
668 in Human Tumor-Infiltrating Lymphocytes. *Immunity* 2008; 28:414–24.
- 669 19. Demetriou M, Granovsky M, Quaggin S, Dennis JW. Negative regulation of T-cell activation and  
670 autoimmunity by Mgat5 N-glycosylation. *Nature* 2001; 409:733–9.
- 671 20. De Munter S, Buhl J, De Cock L, Van Parys A, Daneels W, Pascal E, Deseins L, Ingels J, Goetgeluk G,  
672 Billiet L, et al. Knocking out CD70 rescues CD70-specific nanoCAR T cells from antigen induced  
673 exhaustion. *bioRxiv/523482* 2023; <https://doi.org/10.1101/2023.01.22.523482>.
- 674 21. Maletzki C, Bock S, Fruh P, Macius K, Witt A, Prall F, Linnebacher M. NSG mice as hosts for oncological  
675 precision medicine. *Lab Invest* 2019; :1–11.
- 676 22. Dennis JW, Lau KS, Demetriou M, Nabi IR. Adaptive Regulation at the Cell Surface by N-Glycosylation.  
677 *Traffic* 2009; 10:1569–78.
- 678 23. Li D, Li Y, Wu X, Li Q, Yu J, Gen J, Zhang X-L. Knockdown of Mgat5 Inhibits Breast Cancer Cell Growth  
679 with Activation of CD4+ T Cells and Macrophages. *J Immunol* 2008; 180:3158–65.
- 680 24. Earl LA, Bi S, Baum LG. N- and O-Glycans Modulate Galectin-1 Binding, CD45 Signaling, and T Cell Death.  
681 *J Biol Chem* 2010; 285:2232–44.
- 682 25. Greco B, Malacarne V, De Girardi F, Scotti GM, Manfredi F, Angelino E, Sirini C, Camisa B, Falcone L,  
683 Moresco MA, et al. Disrupting N-glycan expression on tumor cells boosts chimeric antigen receptor T  
684 cell efficacy against solid malignancies. *Sci Transl Med* 2022; 14:eabg3072.
- 685 26. Voss M, Künzel U, Higel F, Kuhn P-H, Colombo A, Fukumori A, Haug-Kröper M, Klier B, Grammer G,  
686 Seidl A, et al. Shedding of glycan-modifying enzymes by signal peptide peptidase-like 3 (SPPL3)  
687 regulates cellular N-glycosylation. *EMBO J* 2014; 33:2890–905.
- 688 27. Heard A, Landmann JH, Hansen AR, Papadopoulou A, Hsu Y-S, Selli ME, Warrington JM, Lattin J, Chang  
689 J, Ha H, et al. Antigen glycosylation regulates efficacy of CAR T cells targeting CD19. *Nat Commun* 2022;  
690 13:3367.
- 691 28. Morgan R, Gao G, Pawling J, Dennis JW, Demetriou M, Li B. N-acetylglucosaminyltransferase V (Mgat5)-  
692 mediated N-glycosylation negatively regulates Th1 cytokine production by T cells. *J Immunol Baltim*  
693 *Md 1950* 2004; 173:7200–8.

- 694 29. Smith LK, Boukhaled GM, Condotta SA, Mazouz S, Guthmiller JJ, Vijay R, Butler NS, Bruneau J, Shoukry  
695 NH, Krawczyk CM, et al. Interleukin-10 Directly Inhibits CD8+ T Cell Function by Enhancing N-Glycan  
696 Branching to Decrease Antigen Sensitivity. *Immunity* 2018; 48:299-312.e5.
- 697 30. Cedeno-Laurent F, Opperman M, Barthel SR, Hays D, Schatton T, Zhan Q, He X, Matta KL, Supko JG,  
698 Frank MH, et al. Metabolic inhibition of galectin-1-binding carbohydrates accentuates anti-tumor  
699 immunity. *J Invest Dermatol* 2012; 132:410–20.
- 700 31. Ye L, Park JJ, Dong MB, Yang Q, Chow RD, Peng L, Du Y, Guo J, Dai X, Wang G, et al. In vivo CRISPR  
701 screening in CD8 T cells with AAV– Sleeping Beauty hybrid vectors identifies membrane targets for  
702 improving immunotherapy for glioblastoma. *Nat Biotechnol* 2019; 37:1302–13.
- 703 32. Gurusamy D, Henning AN, Yamamoto TN, Yu Z, Zacharakis N, Krishna S, Kishton RJ, Vodnala SK,  
704 Eidizadeh A, Jia L, et al. Multi-phenotype CRISPR-Cas9 Screen Identifies p38 Kinase as a Target for  
705 Adoptive Immunotherapies. *Cancer Cell* 2020; 37:818-833.e9.
- 706 33. Hsiao T, Conant D, Rossi N, Maures T, Waite K, Yang J, Joshi S, Kelso R, Holden K, Enzmann BL, et al.  
707 Inference of CRISPR Edits from Sanger Trace Data. 2019.
- 708 34. Laroy W, Contreras R, Callewaert N. Glycome mapping on DNA sequencing equipment. *Nat Protoc*  
709 2006; 1:397–405.
- 710 35. Yang M, Tang X, Zhang Z, Gu L, Wei H, Zhao S, Zhong K, Mu M, Huang C, Jiang C, et al. Tandem CAR-T  
711 cells targeting CD70 and B7-H3 exhibit potent preclinical activity against multiple solid tumors.  
712 *Theranostics* 2020; 10:7622–34.
- 713 36. Rizopoulos D. Generalized Linear Mixed Models using Adaptive Gaussian Quadrature [Internet]. 2022.  
714 Available from: <https://CRAN.R-project.org/package=GLMMadaptive>
- 715 37. R Core Team. A Language and environment for statistical computing [Internet]. Vienna, Austria: R  
716 Foundation for Statistical Computing; 2022. Available from: <https://www.R-project.org/>
- 717 38. Hartig F. DHARMA: Residual Diagnostics for Hierarchical (Multi-Level / Mixed) Regression Models.  
718 [Internet]. Available from: <https://CRAN.R-project.org/package=DHARMA>
- 719 39. Hothorn T, Bretz F, Westfall P. Simultaneous Inference in General Parametric Models.
- 720 40. Venables WN, Ripley BD. Modern Applied Statistics with S. Fourth Edition. Springer, New York: 2002.
- 721 41. Lüdtke D. ggeffects: Tidy Data Frames of Marginal Effects from Regression Models. 2018.
- 722 42. Therneau T. A Package for Survival Analysis in R [Internet]. 2022. Available from: [https://CRAN.R-](https://CRAN.R-project.org/package=survival)  
723 [project.org/package=survival](https://CRAN.R-project.org/package=survival)
- 724 43. Therneau T, Grambsch P. Modeling Survival Data: Extending the Cox Model. Springer, New York: 2000.
- 725 44. Kassambra A, Kosinski M, Biecek P. survminer: Drawing Survival Curves using “ggplot2” [Internet].  
726 2021. Available from: <https://CRAN.R-project.org/package=survminer>
- 727 45. Bates D, Maechler M, Bolker B, Walker S. Fitting Linear Mixed-Effects Models Using lme4. 2015.
- 728 46. Nash JC, Varadhan R. Unifying Optimization Algorithms to Aid Software System Users: optimx for R. *J*  
729 *Stat Softw* 2011; 43:1–14.

730 47. Pustejovsky J. ClubSandwich: Cluster-Robust (Sandwich) Variance Estimators with Small-Sample  
731 Corrections [Internet]. 2022. Available from: <https://CRAN.R-project.org/package=clubSandwich>

732



733 **Tables**

734 **Table 1** | PCR primers to amplify the CRISPR target site. The forward primers were used for Sanger  
735 Sequencing

| Primer name                 | Primer Sequence (5' → 3') | 736 |
|-----------------------------|---------------------------|-----|
| MGAT5 Validation primer Fw  | TCACAGCAGAATGGAAGT        |     |
| MGAT5 Validation primer Rev | ACTGCTTATGAAGGCAGTGG      |     |

738

## Figures

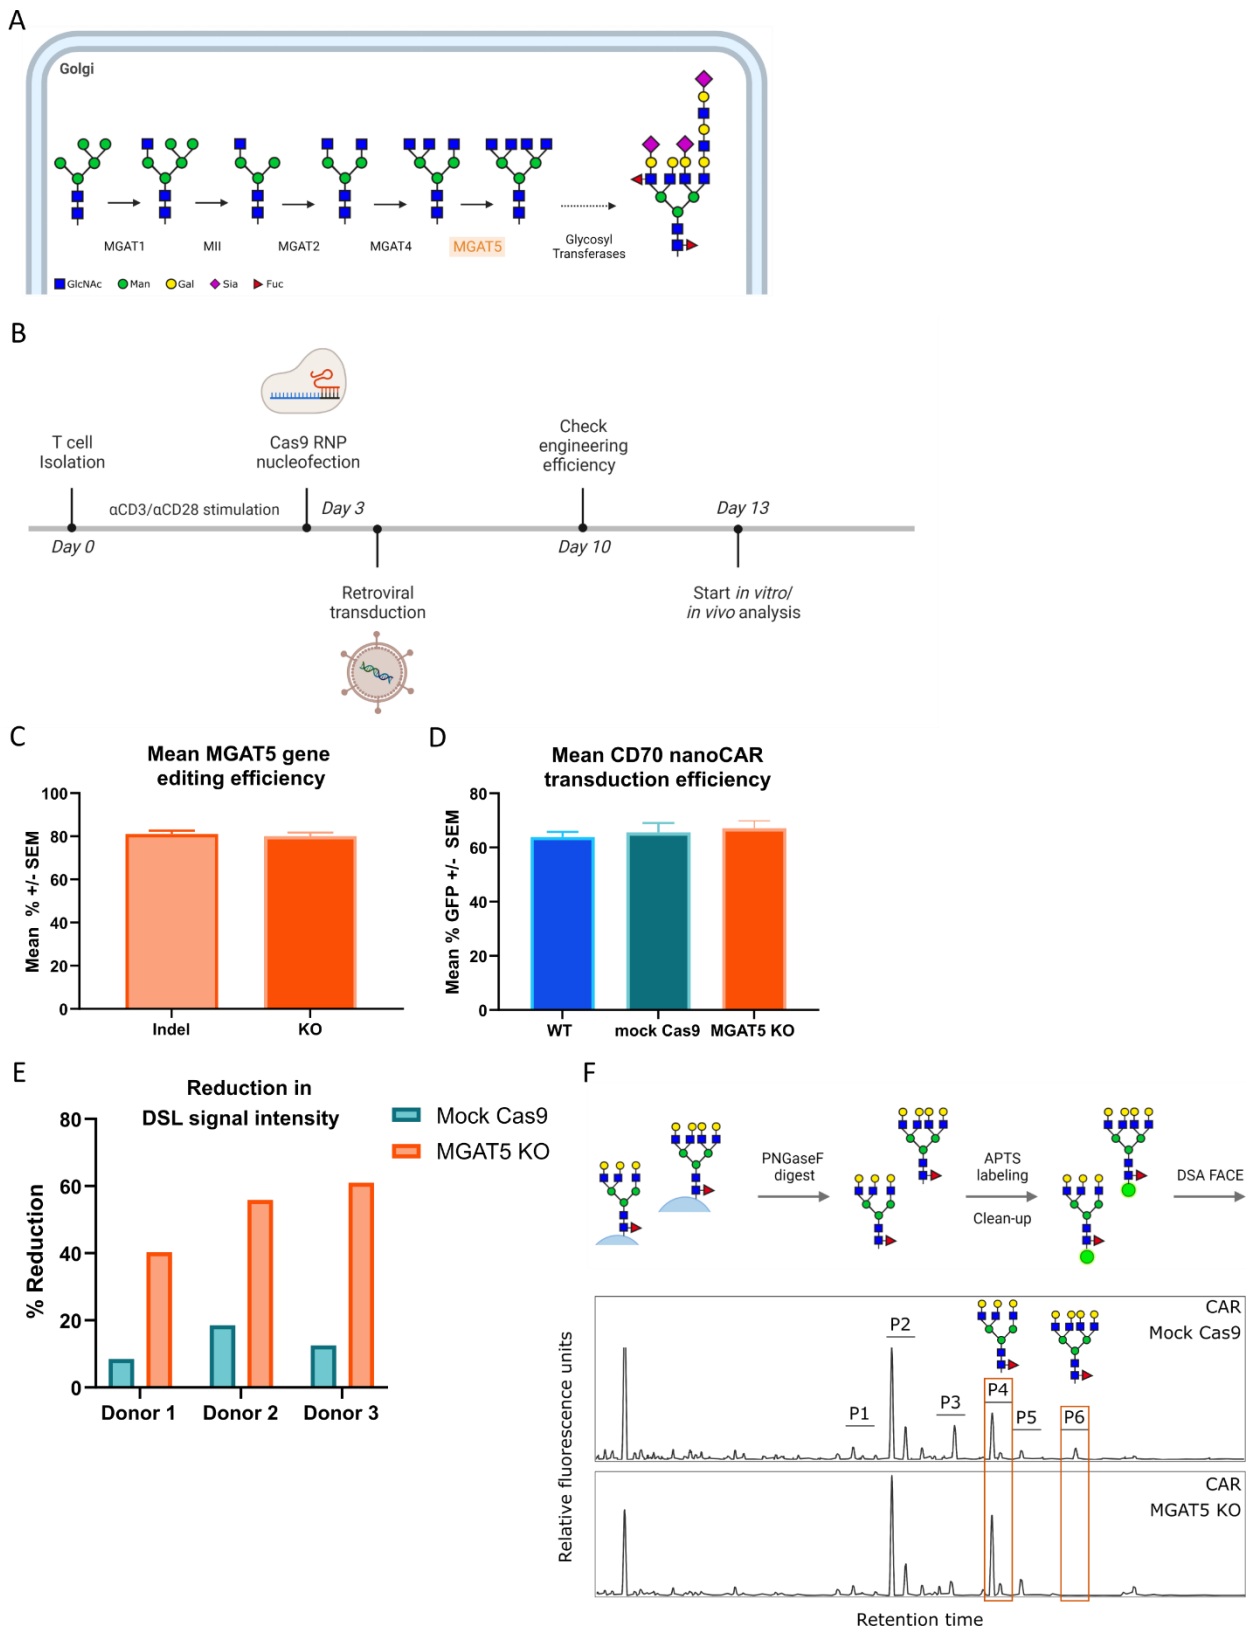

739

740 **Figure 1 | MGAT5 glyco-gene editing and CD70 nanoCAR engineering.** **A.** Pathway of N-glycan branching. N-  
741 glycan branching is achieved through a series of mannosidase (M) and mannosylglycoprotein-N-  
742 acetylglucosaminyltransferase (MGAT)-mediated reactions. The enzyme of interest to our project is  
743 marked in orange. This branching primarily occurs in the medial-Golgi compartment. In later  
744 compartments, branched glycans are acted upon by other enzymes including Gal-, GlcNAc-, sialyl- and  
745 fucosyltransferases to result in complex glycans. **B.** Experimental timeline. **C.** Mean editing efficiency as %  
746 insertions/deletions (indels) or proportion of indels that indicate a frameshift or are 21+ bp in length  
747 (assumes all edits are in a coding region) (KO) obtained for the *Mgat5* locus. **D.** Mean transduction  
748 efficiency as % GFP expressing cells for the different engineering conditions. SEM: standard error of the  
749 mean. **E and F.** Profiling of alterations in cell surface glycosylation upon MGAT5 KO in CD70 nanoCAR T  
750 cells. **E.** Lectin staining.  $2 \times 10^5$  wild type, mock engineered (green) or MGAT5 KO (orange) CAR T cells were  
751 collected, stained with fixable viability dye eFl780 and biotinylated lectin followed by secondary staining  
752 with PE-coupled neutravidin. Analysis was done by flow cytometry and graphs show the reduction in lectin  
753 binding signal intensities as compared to wild type CAR T cells after gating on viable cells. Results are shown  
754 for engineered T cells from three independent blood donors. **F.** DSA-FACE profiling. Schematic  
755 representation of the sample preparation and DSA-FACE profiles of the cell-surface glycome of mock  
756 engineered and MGAT5 KO CAR T cells. Sialidase digest was performed on the samples prior to the analysis.  
757 The major pairs of peaks in the profile are annotated P1-P6.

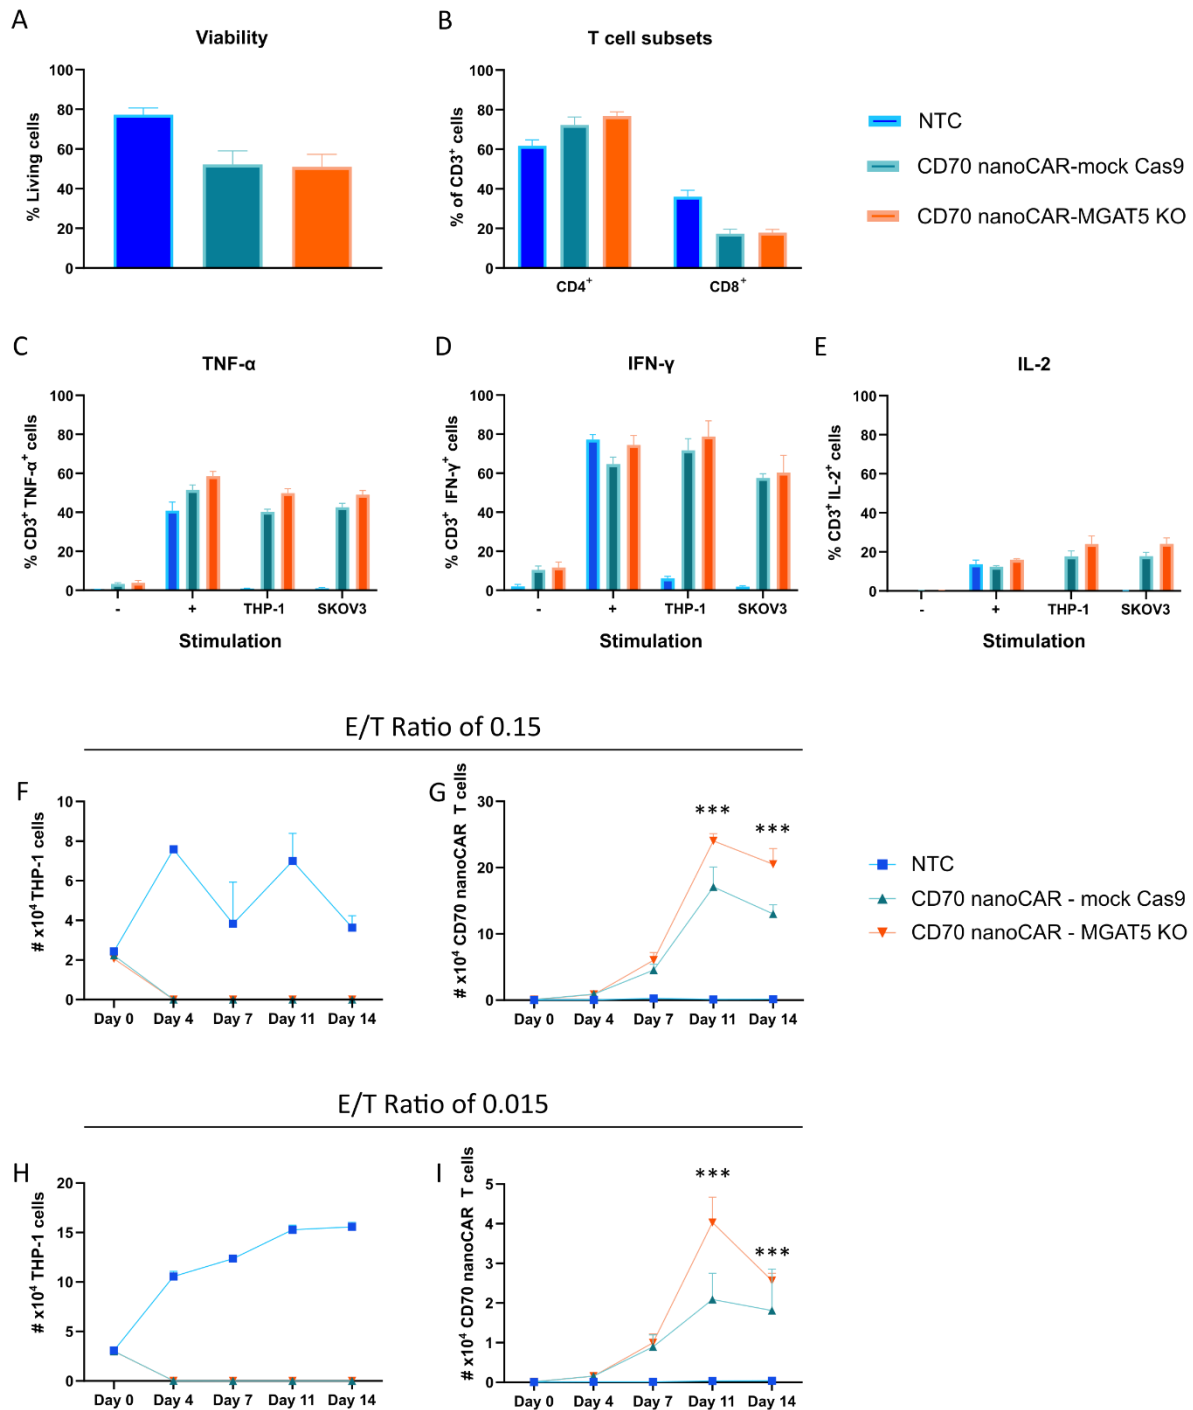

758

759 **Figure 2 | The impact of glyco-engineering in MGAT5 on in vitro CD70 nanoCAR efficacy.** A. and B. Effect of  
760 MGAT5 KO on CD70 nanoCAR viability and subset distribution at day 13 of in vitro culturing. MGAT5 KO  
761 CD70 nanoCAR T cells were generated as described above. At day 13, the immunophenotype of the cells  
762 was evaluated prior to the initiation of the functional assays. Mean data is shown from experiments  
763 performed with three independent donors. Error bars represent the standard error of the mean (SEM). C-  
764 E. The impact of glyco-engineering of MGAT5 on in vitro CD70 nanoCAR cytokine production. Cytokine  
765 production of glyco-engineered CD70 nanoCAR T cells was evaluated by intracellular staining after co-  
766 incubation with THP-1 and SKOV3 target cell lines for 16 hours. Unstimulated cells were included as

767 negative control (-) while Immunocult stimulation was included as positive control (+). Technical duplicates  
768 were analyzed. Mean percentages of TNF- $\alpha$ , IFN- $\gamma$  and IL-2 positive CD3<sup>+</sup> are shown. Mean data is shown  
769 from experiments performed with three independent donors. Error bars represent the standard error of  
770 the mean (SEM). **F-I.** The impact of glyco-engineering in MGAT5 on in vitro CD70 nanoCAR cytotoxic  
771 potential. Glyco-engineered CD70 nanoCAR T cells cultured in the presence of IL-7 and IL-15 were  
772 incubated at different effector to target THP-1 cell ratios in duplicate and cell numbers were analyzed over  
773 a time period of 14 days. A second challenge with THP-1 cells was added at day 7. Error bars represent the  
774 standard error of the mean cell number from data obtained with 3 different T cell donors. **F and G.** Results  
775 for E/T ratio of 0.15 corresponding to the co-culture of 20 000 THP-1 cells with 3 000 glyco-engineered  
776 CD70 nanoCAR T cells. **H and I.** Results for E/T ratio of 0.015 corresponding to the co-culture of 20 000 THP-  
777 1 cells with 300 CD70 nanoCAR T cells. The data from the right panels was modeled using a mixed negative  
778 binomial model with a random intercept for each cluster (a cluster being defined as the set of  
779 measurements sharing the same donor, E/T Ratio and type of CAR T cells). \*\*\* p<0.001.

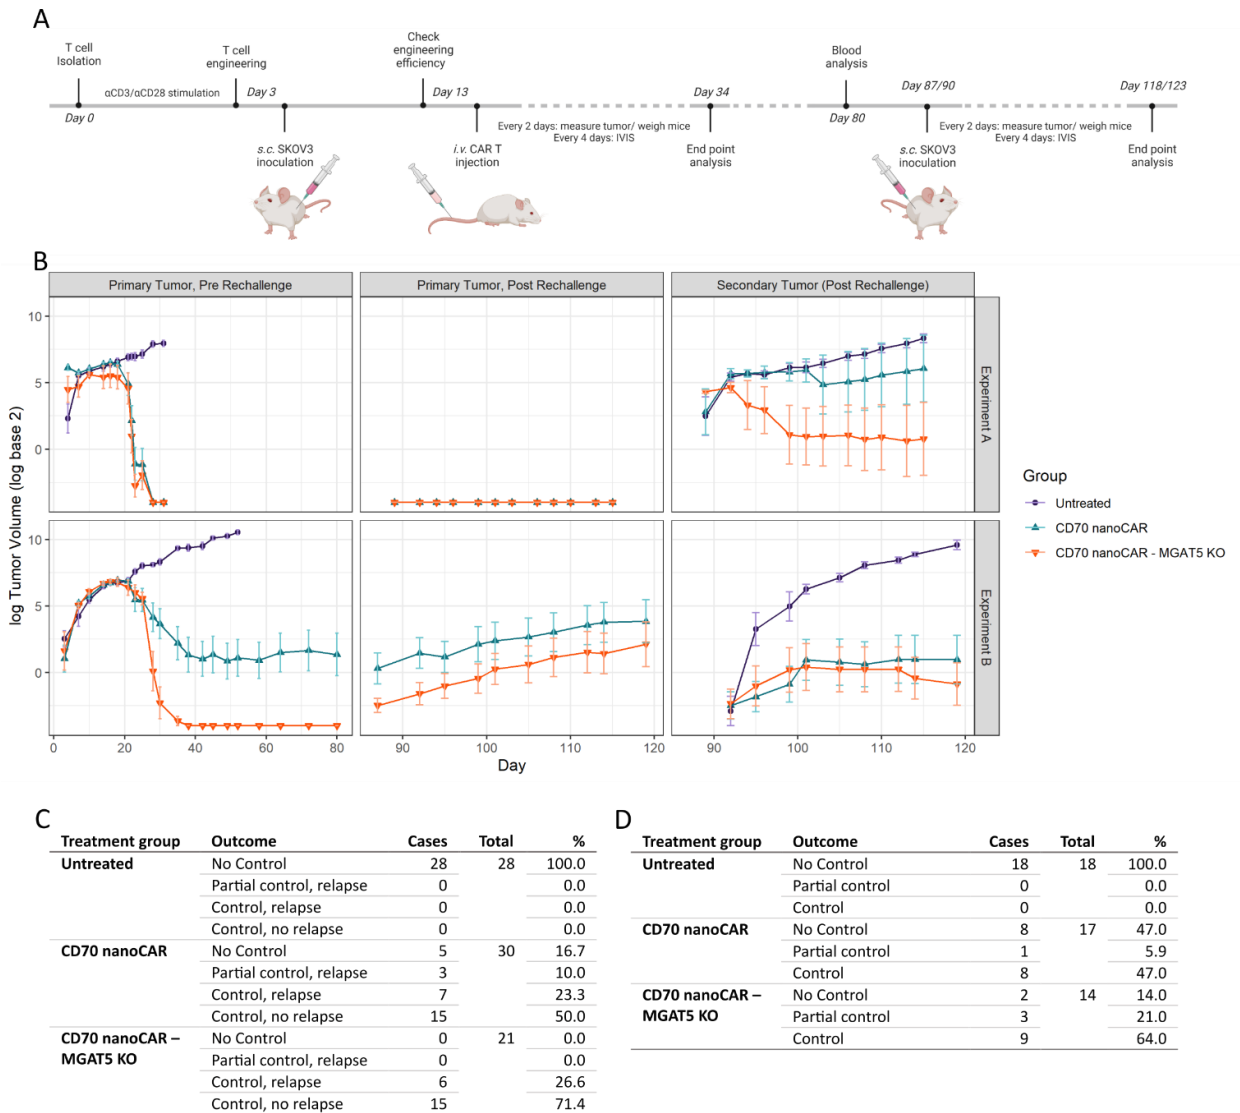

780

781 **Figure 3 | The impact of glyco-engineering on in vivo CD70 nanoCAR functionality.** **A.** Schematic  
 782 representation of the experimental timeline for the study of the in vivo efficacy of MGAT5 KO CD70  
 783 nanoCAR T cells. Timepoints that differ between Experiment A and Experiment B are indicated with a '/'.  
 784 **B.** Tumor burden measured by caliper. Tumor volume is calculated as (tumor length x tumor width<sup>2</sup>)/2.  
 785 Group means are indicated with error bars representing the standard error of the mean (SEM). **C.** Overview  
 786 of the response to primary tumor challenge in the different treatment groups for both experiments  
 787 combined. **D.** Overview of the response to secondary tumor challenge in the different treatment groups  
 788 for both experiments combined.

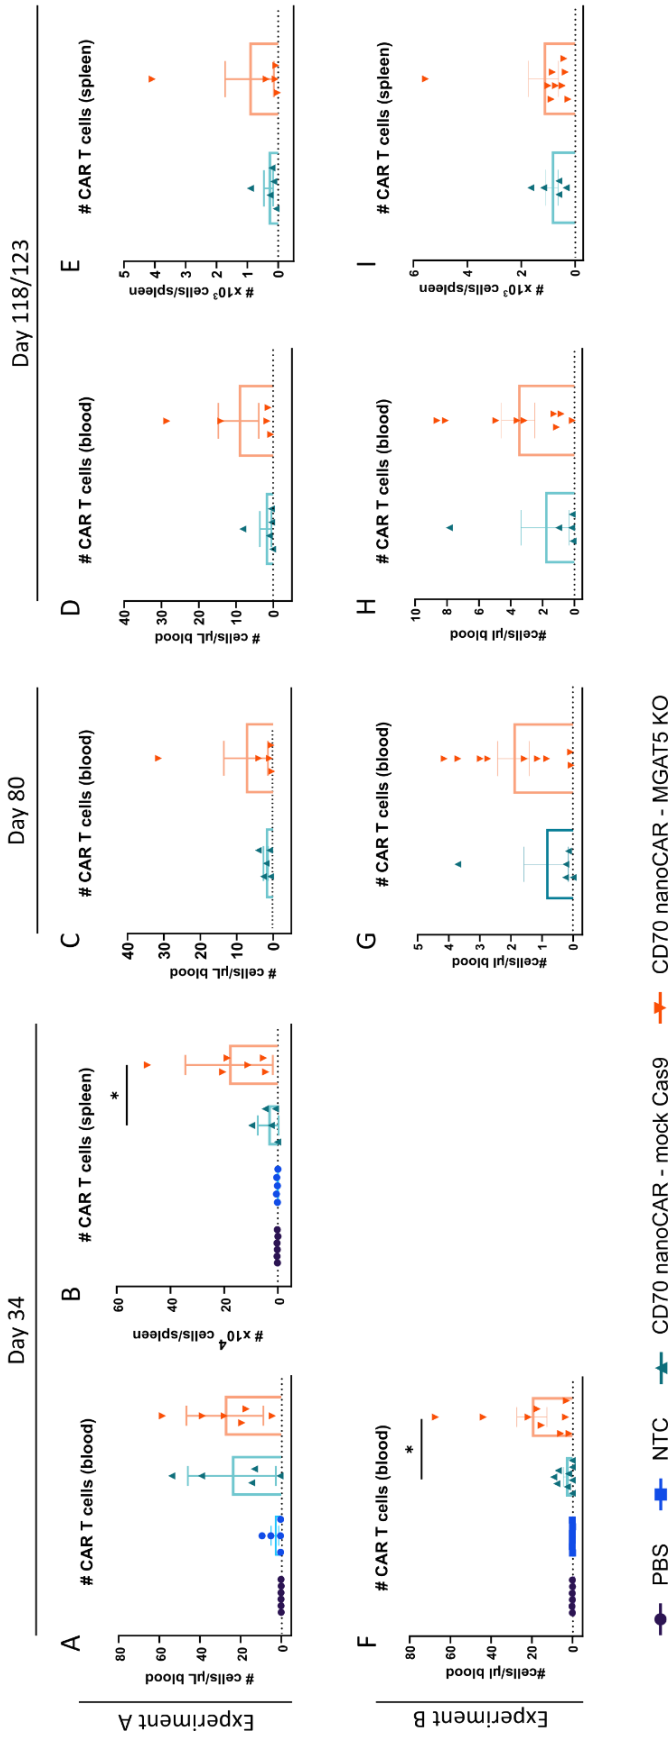

**Figure 4 | Flow cytometry-based analysis of CART cells in blood and spleen.** Immunophenotype of mock Cas9 or MGAT5 KO CD70 nanoCAR T cells in peripheral blood and spleen at day 34, day 80 and day 118 (Experiment A)/day 123 (Experiment B). Data is represented as proportion of CD3<sup>+</sup>GFP<sup>+</sup> cells. Each data point represents a single animal. Error bars represent the standard error of the mean (SEM). P-values were calculated by a one-way ANOVA: \*, P < 0.05 **A, C, D, F, G, H**. The number of CART T cells present in the blood is indicated as cells/ $\mu$ L blood. **B, E, I**. The number of CART T cells in the spleen is indicated as CD4<sup>+</sup> or CD8<sup>+</sup> T cells.

689  
790

791

## Supplementary information

A

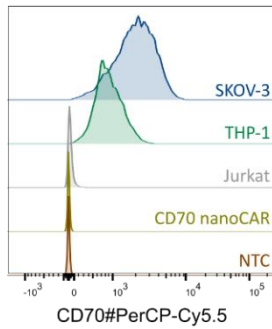

Anti-Galectin + Recombinant Galectin  
Anti-Galectin  
Anti-Galectin + 50 mM lactose  
Unstained control

B

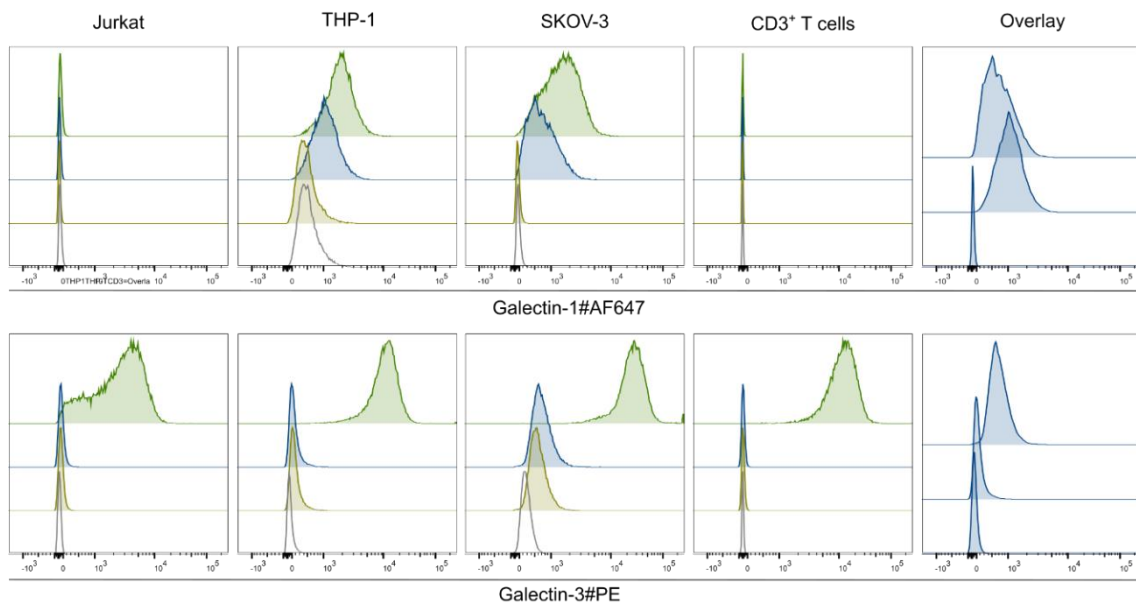

C

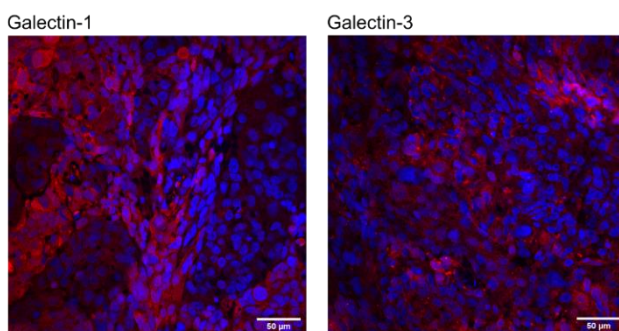

792

793 **Supplementary Figure 1** | Characterization of the THP-1 and SKOV-3 cell lines used as target cells. **A.** CD70  
794 antigen expression on the THP-1 and SKOV-3 target cell lines was evaluated by flow cytometry. Jurkat cells  
795 were included as negative control. Non-transduced control (NTC) and CD70 nanoCAR expressing human T  
796 cells were included to check for auto-antigen expression. **B.** Evaluation of the secretion of Galectins by the  
797 tumor cell lines under study. Secretion and cell surface binding of Galectin-1 and Galectin-3 by different  
798 cell types was assessed by flow cytometry. Jurkat cells were included as negative controls. As a control,



799 lactose was used as competitive inhibitor to reduce cell surface galectin binding. Additionally, cells were  
800 incubated with recombinant galectins as positive control. The secretion and cell surface binding of  
801 Galectin-1 and Galectin-3 on THP-1 and SKOV-3 cells are summarized in the overlaid histograms. Results  
802 representative for two independent experiments are shown. **C.** Representative images of an FFPE tumor  
803 sample expressing Galectin-1 (left) and Galectin-3 (right) at a 25x magnification (red) with DAPI nuclear  
804 counterstain (blue).



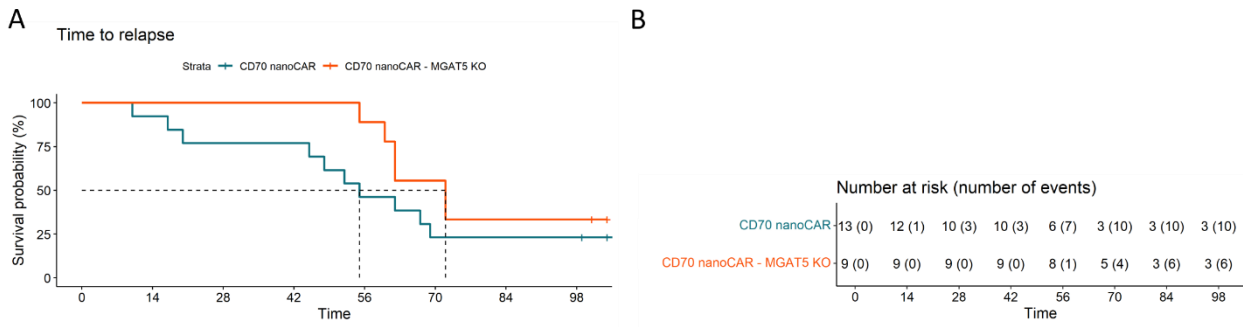

816

817 **Supplementary Figure 3 | Time (in days) to relapse of the primary tumor (Experiment B).** Time zero was set  
 818 as the time that the primary tumor was controlled or partially controlled. An event is the time the tumor  
 819 starts growing again. We take the last day before the tumor has increased in size again or became  
 820 detectable again as the onset of relapse. **A.** Kaplan-Meier curve. This plot shows the probability of relapse-  
 821 free survival in the two groups. The dotted lines indicate median survival times. **B.** Risk and event table  
 822 corresponding to the Kaplan-Meier plot. The table shows the number of mice at risk and, between  
 823 brackets, the cumulative number of relapses in each group and at each time.

A

| Parameter                               | Estimate | S.E.  | Statistic | Adj. p-value |
|-----------------------------------------|----------|-------|-----------|--------------|
| Intercept                               | 5.660    | 0.297 | 19.029    | <0.001       |
| Time 7                                  | 0.077    | 0.035 | 2.221     | 0.147        |
| Time 19                                 | 0.038    | 0.075 | 0.510     | 0.995        |
| Time 26                                 | 0.013    | 0.073 | 0.185     | 1            |
| Group CD70 nanoCAR                      | 0.013    | 0.264 | 0.390     | 0.999        |
| Group CD70 nanoCAR – MGAT5 KO           | -0.780   | 0.619 | -1.261    | 0.711        |
| Time 19 : Group CD70 nanoCAR            | -1595    | 0.149 | -10.704   | <0.001       |
| Time 19 : Group CD70 nanoCAR – MGAT5 KO | -1.601   | 0.128 | -12.526   | <0.001       |
| Time 26 : Group CD70 nanoCAR            | 1.386    | 0.423 | 3.274     | 0.007        |
| Time 26 : Group CD70 nanoCAR – MGAT5 KO | 1.614    | 0.321 | 5.029     | <0.001       |
| Random intercept S.D. (ID = mouse)      | 1.127    |       |           |              |
| Residual S.D.                           | 1.906    |       |           |              |

B

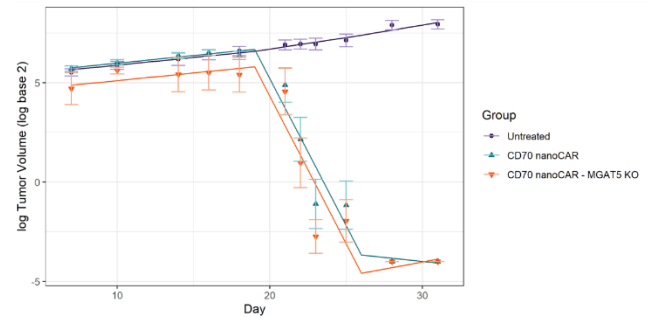

C

| Contrast                                                                                       | Daily change (%) | Estimate | 95% CI (lower) | 95% CI (upper) | Adj. p-value |
|------------------------------------------------------------------------------------------------|------------------|----------|----------------|----------------|--------------|
| Baseline ratio of tumor sizes, CD70 nanoCAR and CD70 nanoCAR – MGAT5 KO average over Untreated | NA               | 0.79     | 0.41           | 1.53           | 0.846        |
| Growth rate day 7-19, all treatment groups                                                     | 6.0              | 1.06     | 0.99           | 1.12           | 0.124        |
| Growth rate day 19-26, Untreated                                                               | 8.0              | 1.08     | 1.00           | 1.17           | 0.032        |
| Growth rate day 19-26, CD70 nanoCAR                                                            | -64.0            | 0.36     | 0.28           | 0.47           | <0.001       |
| Growth rate day 19-26, CD70 nanoCAR-MGAT5 KO                                                   | -64.0            | 0.36     | 0.28           | 0.46           | <0.001       |
| Ratio of growth rate day 19-26 CD70 nanoCAR/MGAT5 KO over Untreated                            | NA               | 0.33     | 0.28           | 0.39           | <0.001       |
| Ratio of growth rate day 19-26 CD70 nanoCAR over CD70 nanoCAR- MGAT5 KO                        | NA               | 1.00     | 0.70           | 1.41           | 1            |

824

825 **Supplementary Figure 4 | Longitudinal analysis of the primary tumor (Experiment A).** Using the longitudinal  
826 data of the primary tumors in Experiment A, a piecewise linear mixed model with the first timepoint at day  
827 7 and knots at day 19 and 26 and with interactions between the group and the first and second time-  
828 segment was fitted, which allows to model the mean traces of each treatment group. **A.** Summary of the  
829 model output, listing all parameter estimates for the model  $\log_{2} \text{TumorVol} \sim \text{Time7} + (\text{Time19} +$   
830  $\text{Time26}) * \text{Group} + (1 | \text{ID})$ . The table gives parameters and standard errors on the  $^2 \log$  scale together with  
831 test statistics and multiple testing adjusted p-values (null hypothesis: parameter equal to zero). **B.** Plot of  
832 the caliper measurements and model fit. The dots are mean  $^2 \log$  tumor volumes with S.E.M. for each group  
833 at each day they were measured. The lines are the model-based predictions for the mean  $^2 \log$  tumor  
834 volume for each group. **C.** Inference for different research questions. In this table, the estimates and  
835 confidence intervals are transformed back to the original scale so we can interpret them in a  
836 straightforward way. E.g. a growth rate of 1.06 means a multiplicative change in tumor volume of 1.06  
837 each day, or a 6% increase each day, compared to the previous day. In this context, the adjusted p-values  
838 also relate to a transformed null hypothesis (i.e. estimate equals one). S.E.: Standard Error. CI: Confidence  
839 Interval.

A

| Parameter                               | Estimate | S.E.  | Statistic | Adj. p-value |
|-----------------------------------------|----------|-------|-----------|--------------|
| Intercept                               | 4.129    | 0.578 | 7.145     | <0.001       |
| Time 89                                 | 0.167    | 0.019 | 8.885     | <0.001       |
| Group CD70 nanoCAR                      | 0.611    | 0.797 | 0.767     | 0.923        |
| Group CD70 nanoCAR – MGAT5 KO           | -0.248   | 0.998 | -0.248    | 1            |
| Time 89 : Group CD70 nanoCAR            | -0.120   | 0.120 | -0.998    | 0.809        |
| Time 89 : Group CD70 nanoCAR – MGAT5 KO | -0.321   | 0.102 | -3.137    | 0.009        |
| Random intercept S.D. (ID = mouse)      | 1.571    |       |           |              |
| Random slope time89 S.D. (ID = mouse)   | 0.198    |       |           |              |
| Correlation random intercept and slope  | -0.292   |       |           |              |
| Residual S.D.                           | 1.361    |       |           |              |

B

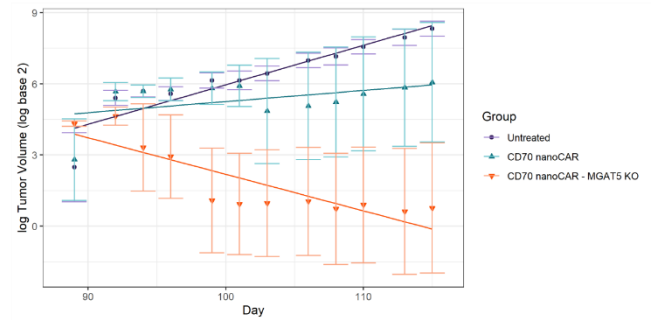

C

| Contrast                                                       | Daily change (%) | Estimate | 95% CI (lower) | 95% CI (upper) | Adj. p-value |
|----------------------------------------------------------------|------------------|----------|----------------|----------------|--------------|
| Growth rate Untreated                                          | 12.0             | 1.12     | 1.09           | 1.16           | <0.001       |
| Growth rate CD70 nanoCAR                                       | 3.0              | 1.03     | 0.85           | 1.26           | 0.973        |
| Growth rate CD70 nanoCAR – MGAT5 KO                            | -10.0            | 0.90     | 0.76           | 1.07           | 0.355        |
| Ratio of growth rate CD70 nanoCAR over CD70 nanoCAR – MGAT5 KO | NA               | 0.87     | 0.67           | 1.13           | 0.505        |

840

841 **Supplementary Figure 5 | Longitudinal analysis of the secondary tumor (Experiment A).** A linear mixed model  
 842 with interactions between the group and time was fitted to the longitudinal data of the secondary tumor  
 843 in Experiment A, which start at day 89. **A.** Summary of the model output, listing all parameter estimates for  
 844 the model  $\log_{2}TumorVol \sim Time89*Group + (Time89 | ID)$ . The table gives parameters and standard errors  
 845 on the  $^2\log$  scale together with test statistics and multiple testing adjusted p-values (null hypothesis:  
 846 parameter equal to zero). **B.** Plot of the caliper measurements and model fit. The dots are mean  $^2\log$  tumor  
 847 volumes with S.E.M. for each group at each day they were measured. The lines are the model-based  
 848 predictions for the mean  $^2\log$  tumor volume for each group. **C.** Inference for different research questions.  
 849 In this table, the estimates and confidence intervals are transformed back to the original scale so we can  
 850 interpret them in a straightforward way. S.E.: Standard Error. CI: Confidence Interval.

A

| Parameter                               | Estimate | S.E.  | Statistic | Adj. p-value |
|-----------------------------------------|----------|-------|-----------|--------------|
| Intercept                               | 4.973    | 0.360 | 13.823    | <0.001       |
| Time 7                                  | 0.151    | 0.025 | 5.974     | <0.001       |
| Time 21                                 | -0.0019  | 0.036 | -0.525    | 0.996        |
| Time 33                                 | -0.055   | 0.023 | -2.410    | 0.098        |
| Group CD70 nanoCAR                      | 0.262    | 0.321 | 0.816     | 0.952        |
| Group CD70 nanoCAR – MGAT5 KO           | 0.398    | 0.338 | 1.179     | 0.781        |
| Time 21 : Group CD70 nanoCAR            | -0.623   | 0.097 | -6.404    | <0.001       |
| Time 21 : Group CD70 nanoCAR – MGAT5 KO | -1.095   | 0.037 | -29.292   | <0.001       |
| Time 33 : Group CD70 nanoCAR            | 0.578    | 0.098 | 5.914     | <0.001       |
| Time 33 : Group CD70 nanoCAR – MGAT5 KO | 1.019    | 0.044 | 22.979    | <0.001       |
| Random intercept S.D. (ID = mouse)      | 1.074    |       |           |              |
| Random slope Time7 S.D. (ID = mouse)    | 0.087    |       |           |              |
| Correlation random intercept and slope  | -0.348   |       |           |              |
| Residual S.D.                           | 1.67     |       |           |              |

B

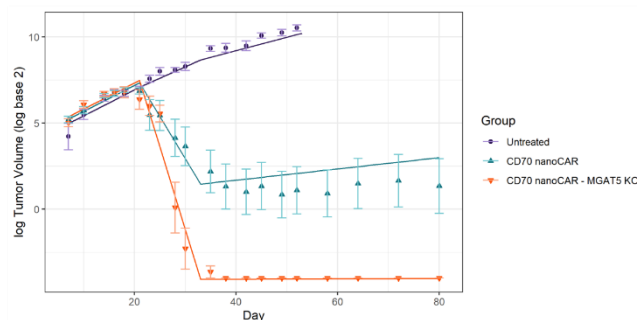

C

| Contrast                                                                                       | Daily change (%) | Estimate | 95% CI (lower) | 95% CI (upper) | Adj. p-value |
|------------------------------------------------------------------------------------------------|------------------|----------|----------------|----------------|--------------|
| Baseline ratio of tumor sizes, CD70 nanoCAR and CD70 nanoCAR – MGAT5 KO average over Untreated | NA               | 1.26     | 0.71           | 2.22           | 0.897        |
| Growth rate day 7-21, all treatment groups                                                     | 11.0             | 1.11     | 1.06           | 1.17           | <0.001       |
| Growth rate day 22-33, Untreated                                                               | 10.0             | 1.10     | 1.06           | 1.13           | <0.001       |
| Growth rate day 33-84, Untreated                                                               | 6.0              | 1.06     | 1.03           | 1.08           | <0.001       |
| Growth rate day 22-33, CD70 nanoCAR                                                            | -29.0            | 0.71     | 0.59           | 0.86           | <0.001       |
| Growth rate day 33-84, CD70 nanoCAR                                                            | 2.0              | 1.02     | 0.97           | 1.08           | 0.995        |
| Growth rate day 22-33, CD70 nanoCAR – MGAT5 KO                                                 | -49.0            | 0.51     | 0.48           | 0.55           | <0.001       |
| Growth rate day 33-84, CD70 nanoCAR – MGAT5 KO                                                 | 0.0              | 1.00     | 0.96           | 1.04           | 1            |
| Ratio of average growth rate day 22-32 CD70 nanoCAR/ MGAT5 KO over Untreated                   | NA               | 0.55     | 0.50           | 0.61           | <0.001       |
| Ratio of growth rate day 22-32 CD70 nanoCAR over CD70 nanoCAR – MGAT5 KO                       | NA               | 0.72     | 0.59           | 0.88           | <0.001       |
| Ratio of average growth rate day 33-84 CD70 nanoCAR/ MGAT5 KO over Untreated                   | NA               | 0.96     | 0.92           | 1.0            | <0.001       |
| Ratio of growth rate day 33-84 CD70 nanoCAR over CD70 nanoCAR – MGAT5 KO                       | NA               | 0.98     | 0.91           | 1.05           | 0.981        |
| Tumor volume day 60, CD70 nanoCAR                                                              | NA               | 5.07     | 0.32           | 80.07          | <0.001       |

851

852

853

854

855

856

857

858

859

860

861

862

**Supplementary Figure 6 | Longitudinal analysis of the primary tumor (Experiment B).** A piecewise linear mixed model with interactions between the group and the second- and third-time segment was fitted to the longitudinal data of the primary tumor in Experiment B. The data start at day 7 and knots are added at day 21 and 33. **A.** Summary of the model output, listing all parameter estimates for the model  $\log_{2} \text{TumorVol} \sim \text{Time7} + (\text{Time21} + \text{Time33}) * \text{Group} + (\text{Time7} | \text{ID})$ . The table gives parameters and standard errors on the  $\log_{2}$  scale together with test statistics and multiple testing adjusted p-values (null hypothesis: parameter equal to zero). **B.** Plot of the caliper measurements and model fit. The dots are mean  $\log_{2}$  tumor volumes with S.E.M. for each group at each day they were measured. The lines are the model-based predictions for the mean  $\log_{2}$  tumor volume for each group. **C.** Inference for different research questions. In this table, the estimates and confidence intervals are transformed back to the original scale so we can interpret them in a straightforward way. S.E.: Standard Error. CI: Confidence Interval.

A

| Parameter                              | Estimate | S.E.  | Statistic | Adj. p-value |
|----------------------------------------|----------|-------|-----------|--------------|
| Intercept                              | 0.897    | 0.700 | 1.282     | 0.428        |
| Time                                   | 0.158    | 0.022 | 7.077     | <0.001       |
| Group CD70 nanoCAR – MGAT5 KO          | -2.126   | 0.881 | -2.415    | 0.041        |
| Random intercept S.D. (ID = mouse)     | 2.047    |       |           |              |
| Random slope time S.D. (ID = mouse)    | 0.083    |       |           |              |
| Correlation random intercept and slope | -0.434   |       |           |              |
| Residual S.D.                          | 1.251    |       |           |              |

B

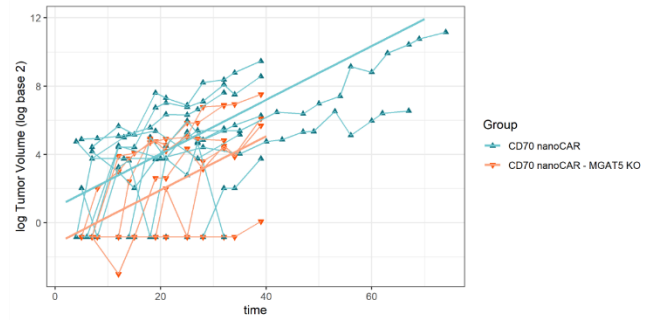

C

| Contrast                                                                | Daily change (%) | Estimate | 95% CI (lower) | 95% CI (upper) | Adj. p-value |
|-------------------------------------------------------------------------|------------------|----------|----------------|----------------|--------------|
| Average ratio in tumor volume, CD70 nanoCAR over CD70nanoCAR – MGAT5 KO | NA               | 4.37     | 1.12           | 17.08          | 0.031        |
| Growth rate CD70 nanoCAR and CD70 nanoCAR – MGAT5 KO                    | 12               | 1.12     | 1.08           | 1.15           | <0.001       |

863

864

865

866

867

868

869

870

871

872

873

874

875

876

877

878

879

880

881

882

**Supplementary Figure 7 | Longitudinal analysis of the relapse of the primary tumor (Experiment B).** A linear mixed model was fitted to the longitudinal data of the relapsing mice in Experiment B. Only mice in the treated groups had cleared the tumors fully or partially, so the analysis is naturally restricted to the two CAR groups. To enable this analysis, we also had to change the timescale for each individual mouse such that the first day of the relapse became day 0. Had we not done this, the analysis would be moot since, on average, the CD70 nanoCAR group had relapses earlier than the CD70 nanoCAR – MGAT5 KO group. This would almost automatically result in larger tumors in the CD70 nanoCAR group compared to the CD70 nanoCAR – MGAT5 KO group. **A.** Summary of the model output, listing all parameter estimates for the model  $\log_{2} \text{TumorVol} \sim \text{Time} + \text{Group} + (\text{Time} \mid \text{ID})$ . The table gives parameters and standard errors on the  $^2 \log$  scale together with test statistics and multiple testing adjusted p-values (null hypothesis: parameter equal to zero). **B.** Plot of the caliper measurements and model fit. The dots are individual  $^2 \log$  tumor volumes. Dots connected by a line are measurements from the same mouse (note that due to the time translation, mean values per day are not informative, since not all measurements were made on the same day on the new timescale). The two straight lines are the model-based predictions for the mean  $^2 \log$  tumor volume for each group. **C.** Inference for different research questions. In this table, the estimates and confidence intervals are transformed back to the original scale so we can interpret them in a straightforward way. Note that the interaction between Time and Group was not significant here so the growth rate is the same in each group but the tumors are smaller on average in the MGAT KO group. S.E.: Standard Error. CI: Confidence Interval.

A

| Parameter                                | Estimate | S.E.  | Statistic | Adj. p-value |
|------------------------------------------|----------|-------|-----------|--------------|
| Intercept                                | -0.759   | 0.982 | -0.773    | 0.936        |
| Time 92                                  | 0.0824   | 0.105 | 7.823     | <0.001       |
| Time 101                                 | -0.694   | 0.110 | -6.314    | <0.001       |
| Group CD70 nanoCAR                       | -1.503   | 0.862 | -1.743    | 0.345        |
| Group CD70 nanoCAR – MGAT5 KO            | 0.027    | 0.892 | 0.030     | 1            |
| Time 101 : Group CD70 nanoCAR            | -0.047   | 0.101 | -0.461    | 0.994        |
| Time 101 : Group CD70 nanoCAR – MGAT5 KO | -0.282   | 0.192 | -1.471    | 0.522        |
| Random intercept S.D. (ID = mouse)       | 2.851    |       |           |              |
| Random slope time92 S.D. (ID = mouse)    | 0.21     |       |           |              |
| Correlation random intercept and slope   | -0.817   |       |           |              |
| Residual S.D.                            | 2.230    |       |           |              |

B

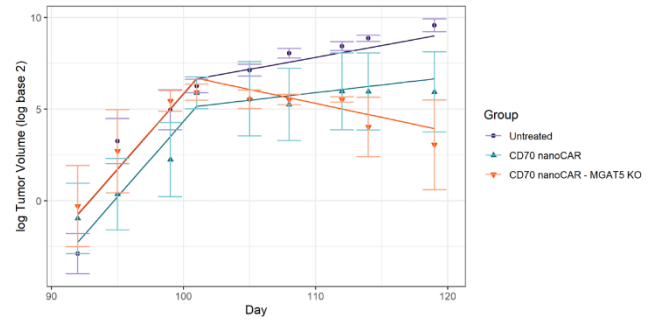

C

| Contrast                                                                    | Daily change (%) | Estimate | 95% CI (lower) | 95% CI (upper) | Adj. p-value |
|-----------------------------------------------------------------------------|------------------|----------|----------------|----------------|--------------|
| Growth rate day 92-101, all treatment groups                                | 77.0             | 1.77     | 1.47           | 2.13           | <0.001       |
| Growth rate day 101-121, Untreated                                          | 9.0              | 1.09     | 1.01           | 1.19           | 0.018        |
| Growth rate day 101-121, CD70 nanoCAR                                       | 6.0              | 1.06     | 0.90           | 1.25           | 0.845        |
| Growth rate day 101-121, CD70 nanoCAR – MGAT5 KO                            | -10.0            | 0.90     | 0.66           | 1.23           | 0.855        |
| Ratio of growth rate day 101-121, CD70 nanoCAR over CD70 nanoCAR – MGAT5 KO | NA               | 0.85     | 0.59           | 1.22           | 0.683        |

883

884 **Supplementary Figure 8 | Longitudinal analysis of the secondary tumor (Experiment B).** A piecewise linear  
885 mixed model with interactions between the group and the second time segment was fitted to the  
886 longitudinal data of the secondary tumor in Experiment B. The data start at day 92 and a knot is added at  
887 day 101. **A.** Summary of the model output, listing all parameter estimates for the model  $\log TumorVol \sim$   
888  $Time92 + Time101 * Group + (Time92 | ID)$ . The table gives parameters and standard errors on the  $^2\log$  scale  
889 together with test statistics and multiple testing adjusted p-values (null hypothesis: parameter equal to  
890 zero). **B.** Plot of the caliper measurements and model fit. The dots are mean  $^2\log$  tumor volumes with S.E.M.  
891 for each group at each day they were measured. The lines are the model-based predictions for the mean  
892  $^2\log$  tumor volume for each group. **C.** Inference for different research questions. In this table, the estimates  
893 and confidence intervals are transformed back to the original scale so we can interpret them in a  
894 straightforward way. S.E.: Standard Error. CI: Confidence Interval.
